# Year-to-year crop shifts promote weed diversity in tropical permanent rainfed cultivation

---

Margot Neyret<sup>a</sup>, Anneke de Rouw<sup>a</sup>, Nathalie Colbach<sup>b</sup>, Henri Robain<sup>a</sup>, Bounsamay Soulléuth<sup>c</sup>,

5 Christian Valentin<sup>a</sup>

<sup>a</sup> Institute of Ecology and Environmental Sciences, Paris - IRD, INRA, CNRS, Sorbonne Université

<sup>b</sup> Agroécologie, AgroSup Dijon - INRA, Univ. Bourgogne, Univ. Bourgogne Franche-Comté

<sup>c</sup> Institute of Ecology and Environmental Sciences, Vientiane, Lao PDR - IRD, INRA, CNRS,

10 Sorbonne Université

## Graphical abstract

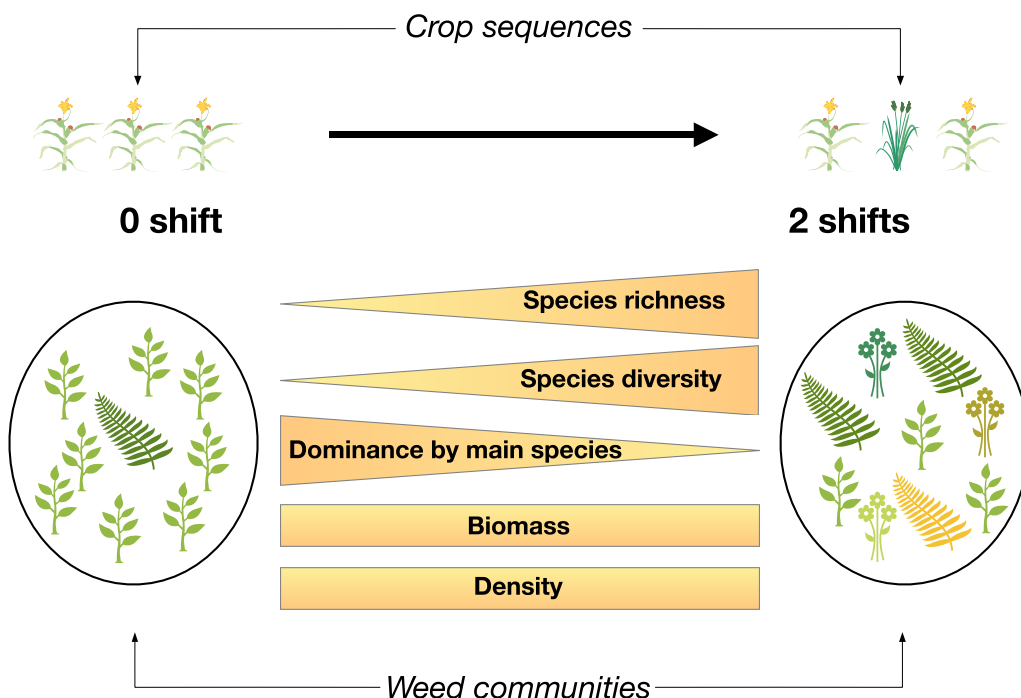

15

## Abstract

In the past decades, the expansion and modernisation of agriculture in the mountainous areas of Southeast Asia has had severe impacts on biodiversity, as the once species-rich forests were turned into homogeneous fields receiving ample external inputs. A common feature of permanent cropping with annual crops is the frequent change of crop choice, depending on market opportunities or other motives. However, the precise effect of crop shifts on weeds in tropical areas is largely unknown. In this study, we investigated the short-term effect of crop sequences on the diversity of weed communities in smallholder fields in Northern Thailand. Crop choices were upland rice, maize, fallow and young tree plantations with or without intercrop. We counted the number of crop shifts and the number of crops involved during a 3-years period preceding weed sampling. We showed that the number of crop shifts did not affect weed density and biomass. However, herbaceous species number and diversity (measured as Shannon index) increased by 36% and 46% respectively, while herbaceous species dominance decreased by 38%, in fields with yearly crop shifts compared to fields with no shifts in the previous three years. The effect of a particular crop on diversity, or the effect of

30 intercropping with young trees, was weaker. It was likely due to the more variable resources  
(especially light) in fields with two crop shifts, allowing species with different niches to co-exist. Crop  
type and frequent crop shifts did not affect shrub and tree species number, diversity or dominance.  
Some species were strongly associated with fields with no crop shift in the sequence (e.g. the tree  
35 *Antidesma velutinsum*) or to fields with two crop shifts in the sequence (e.g. the herb *Centella*  
*asiatica*, the C<sub>4</sub> grass *Digitaria radicata*). Overall, this study showed that in this agronomical system,  
maintaining yearly crop shifts does not significantly affect weed abundance, but supports in-field  
plant species diversity, which is likely to impact the services provisioned by tropical mountainous  
agro-ecosystems

40 .

## Highlights

- Frequent crop shifts in a crop sequence increased weed richness and diversity.
- Crop shifts had a stronger effect on weed richness and diversity than the current crop.
- The number of crop shifts did not affect weed biomass and density.

45

## Keywords

Crop rotation; Southeast Asia; weeds community; smallholder; Thailand; rainfed rice; rubber tree  
intercropping; maize

## 50 **1. Introduction**

The growing use of pesticides and fertilisers and the decrease of crop diversity associated with the modernisation of agriculture have led to a worldwide decrease of in-field biodiversity, soil quality and organic matter content, and an acceleration of surface water eutrophication (Tilman, 2001; Tscharntke et al., 2005). In temperate areas, agricultural intensification has been shown to strongly  
55 affect weed communities, by favouring species that are more competitive and mimic the main crop (Fried et al., 2010, 2012, 2015) and overall by decreasing in-field weed diversity and abundance (Squire et al., 2000; Hyvönen and Salonen, 2002; Baessler and Klotz, 2006; Fried et al., 2009; Hyvönen et al., 2011).

Yet, multiple ecosystem services depend on the maintenance of weed diversity (Matson et al., 1997; Tscharntke et al., 2005). Diverse plant communities are indicative of the wider sustainability and  
60 resistance to stress of the cropping system (Chen et al., 2004; Storkey and Neve, 2018). They provide food sources for biodiversity at higher trophic levels during extended periods (Marshall et al., 2003; Petit et al., 2011; Edesi et al., 2012) and promote large and rich populations of pollinators necessary to the cultivation of arthropod-pollinated crops (Bàrberi et al., 2010). Plant cover is also a major  
65 element of soil conservation by favouring infiltration, enhancing soil structure and organic carbon stocks (Durán Zuazo and Pleguezuelo, 2008). Contrasted plant traits have been shown to protect soil in various ways: the root density and the proportion of fine roots limit surface erosion (Burylo et al., 2012a, 2012b) while deeper roots stabilise slopes (Stokes et al., 2008). As a result, diverse weed communities enhance erosion mitigation: diverse root growth forms, for instance, have been shown  
70 to increase soil protection (Beierkuhnlein and Jentsch, 2004). Weeds also provide other key services such as pest control (Crowder and Jabbour, 2014), water filtration or nutrient cycling (Gholamhoseini et al., 2013a, 2013b; Yagioka et al., 2015), which are severely threatened by current agricultural changes.

From the 1970s onward, population growth and rapid economic development led to the expansion  
75 of arable lands to the detriment of natural and semi-natural areas and to a quick increase in the use of herbicides and fertilisers (Rerkasem and Rerkasem, 1995; Rigg et al., 2012). The development of cash crops was associated with the disruption of traditionally diverse cropping systems (Rerkasem et al., 2009). In Southeast Asia, one of the hotspots of biodiversity worldwide, these changes have occurred at an unprecedented scale (Fox et al., 2014). A better understanding of the relationships  
80 between these changes in cropping practices and non-cultivated biodiversity is particularly critical in mountainous areas, where biodiversity has been strongly affected by the recent modernisation of farming practices (Rerkasem et al., 2009).

Crop rotation is the practice of growing different crops on the same land from year to year following a more or less fixed cycle. Besides their well-known positive effects on soil health and fertility (Watson et al., 2002), erosion mitigation (Morgan, 2005), and crop disease risk reduction (Colbach et al., 1994), crop rotations are also an important method of weed control, as they prevent the build-up of aggressive weed communities linked to cultivating the same crop over and over again (Liebman and Dyck, 1993, Radosevich et al., 1997, Doucet et al., 1999; Squire et al., 2000 ; Adler et al., 2006; Ulber et al., 2009; Allan et al., 2014; Gaba et al., 2014). Most of these studies investigated the effect of well-defined rotations (Cardina et al., 2002; Nikolić et al., 2018; Shahzad et al., 2016) such as the common maize-soybean-wheat (Doucet et al., 1999) on weed communities and crop yield. A few studies have also proposed various metrics to define crop rotations, such as the proportion of a focus crop in the rotation. But the idea that crop rotations follow a fixed pattern can be questioned (von Redwitz and Gerowitt, 2018). In Southeast Asia, the rainfed cultivation such as the system we studied does not follow predetermined patterns, but rather results from year-to-year decisions based on the current meteorological or socio-economic context. There is an element of randomness that may be linked to the choices of individual farmers. The effect of these crop sequences on weed communities is unknown. It is urgent to investigate the weed diversity under any crop sequence, not only under the sequence of the rather standard and well-known crop rotations.

In this study, we determine the effect of crop sequences on the richness, diversity, biomass and density of weed communities in fifteen permanently cropped smallholder fields in mountainous Northern Thailand. We characterised the sequences using the number of crop shifts, and the number of crop types. We also aimed at identifying species that are indicators of fields with frequent crop shifts. We conducted weed sampling in the rainy season to collect additional information on agricultural practices and crop stand and in the dry season to collect information on the effect on weeds of post-harvest conditions such as water availability. We hypothesised that fields with frequent shifts would have more diverse and less abundant weed communities, especially in the dry season when the effect of the most recent crop is weaker, while weed biomass would be overall higher in the rainy season due to higher water availability.

## 2. Material and Methods

### 2.1. Study site

The study site was located in Huai Lang, Chiang Rai province, northern Thailand. The site is part of a wider project investigating the soil-water effects of land use transitions. The fields were located in

and around two catchments, respectively dominated by annual cultivation or rubber tree plantations.  
115 An automatic weather station (Campbell BWS200) has been installed on-site since March 2015. The site is characterised by  $1300 \pm 200$  mm of annual rainfall, mostly falling during the rainy season (May to November). Mean annual temperature is  $24.5 \pm 0.4$  C, with daily temperatures ranging from 4.8 to 42.5 C. A detailed soil mapping showed that soils are Haplustalfs (Alfisols) and belong to three soil series (Tha li, Wang Saphung, and Muak Lek, based on Jumpa (2012)), mostly differentiated on depth  
120 and slope criteria. The soils were otherwise rather uniform, well drained and with clay to clay-loam texture.

Paddies (wet rice), maize fields and settlements occupied most of the flatlands but we focused our study the rain-fed fields of the hillslopes, which have typically steep slopes ranging from 27 % to 54 % (median 40 %). The size of the study fields ranged from 0.64 ha to 2.6 ha (median 1.6 ha). On the  
125 hillslopes, maize (cash crop) and upland rice (subsistence crop) were grown in monoculture or as an intercrop between rows of young trees (most often immature rubber trees). Farmers prepared their fields between April and June and, with a few exceptions, they burnt crop residues before seeding. In a given field, maize was grown for one, two or three consecutive years and rice only for one or two years. Upland rice was planted at the beginning of the rainy season (late May-June) whereas the  
130 planting period of maize was more flexible. Indeed, being a crop with a short growing season, maize could be sown later in the rainy season (from May and up to July) and benefited from the long growing season associated with the bimodality of the climate. Maize and rice were harvested during October and November, respectively. The steep slopes did not permit ploughing and the soil was mostly left undisturbed, except for occasional manual surface hoeing. The upland rice varieties in the study area  
135 were long-cycle landraces (i.e. locally adapted varieties), typically tall varieties with drooping leaves providing dense shadow. In contrast, the maize varieties were modern, short-cycle and herbicide-resistant improved varieties grown as a cash crop for animal feed. Rice was planted in hills with an average density of 130 000 hill/ha, which was common for landraces in the area. Maize was sown in densities of 31 000 hill/ha, with two plants per hill, which was in the low range of typical sowing  
140 densities (20 000 hill/ha to 80 000 hill/ha). In both maize and rice glyphosate was the most common herbicide, applied with rates ranging from 0.7 L/ha to 25 L/ha (at 480 g/L) and often in combination with other herbicides such as paraquat or atrazine (Neyret et al., 2018). These values, displaying a surprisingly large range, were reported by farmers but could not be checked in the field. Herbicides were sprayed before or just after sowing in rice (May - June), and before sowing (April - May) and  
145 sometimes after emergence (July) in maize. Most farmers fertilised their field by applying 13 kg/ha

to 130 kg/ha of fertiliser: usually urea (46-00) once a year, more rarely twice a year or in combination with ammonium sulphate (21-00) or NPK fertilizer (15-15-15).

150 Rubber (*Hevea brasiliensis*) is an important cash crop in the study area. The oldest plantations were planted at the beginning of the 2000s, and the expansion of rubber trees is ongoing. Saplings of rubber trees are planted on the slopes (approx. 500-550 trees/ha) and commonly intercropped with maize or upland rice during 4 – 5 years when young allowing farmers to improve their income. Intercropping of maize and upland rice with longan fruit trees (*Dimocarpus longan*) is also common. Longan is planted in low densities (approx. 300 trees/ha).

## 2.2. Sampling protocol

155 In March 2016, we selected 15 fields (five maize fields, five upland rice fields, five young rubber trees plantations with maize intercrop). We chose field locations in order to avoid spatial clustering of similar crops. This was done by selecting distinct sectors with at least 2-3 different crop types within a few hundred meters each. In each field, we delimited a 100-m<sup>2</sup> area in a section representative of the whole field (i.e. avoiding field edges and large terrain irregularities). We then  
160 divided this area into a regular grid of ten by ten 1-m<sup>2</sup> subplots and randomly drew 5 numbers between 1 and 100, which determined the position of five 1-m<sup>2</sup> subplots in the grid. We conducted complete botanical inventories (e.g. individual plant counts and identification) in these subplots. We also collected the aboveground biomass of all living herbaceous weeds, shrubs and trees (thus excluding crop biomass); it was stored in paper bags and dried at 50 °C for 48 h before weighting.  
165 Biomass measurements were then averaged for each field. As resprouting trees and shrubs were less abundant than herbaceous species, we also counted and identified all trees and shrubs in the 100-m<sup>2</sup> areas. Both herbaceous and shrub/tree densities exclude crops, and were then converted to the average number of plants per square meter for each 100-m<sup>2</sup> area.

In total, this protocol was maintained in the same fields (but in different subplots) during three  
170 years. Sampling was conducted three times in the dry season (in March 2016, 2017 and 2018, before field preparation); and twice in the rainy season (October 2016 and November 2017, just after the harvest). Sometimes the crop was not fully mature and we sampled fields shortly before harvest - and thus did not collect data on yield. In the rainy season soil moisture was on average 2 to 3 times higher than in the dry season (Neyret, 2019). Samplings were conducted at least two (rainy season) or seven  
175 (dry season) months after the last herbicide application.

**Table 1. Selected descriptors of plant communities.**

|           | Name                | Calculation                                                                                                                                                                                 | Biological meaning                                                                                                                                                                                                                                     | Details on calculation                                                               |
|-----------|---------------------|---------------------------------------------------------------------------------------------------------------------------------------------------------------------------------------------|--------------------------------------------------------------------------------------------------------------------------------------------------------------------------------------------------------------------------------------------------------|--------------------------------------------------------------------------------------|
| Diversity | Species number      | S (number of species present in the field)                                                                                                                                                  | Species richness, simple biodiversity indicator. Provides the size of the local species pool                                                                                                                                                           |                                                                                      |
|           | Shannon index       | $H' = - \sum_i p_i \log(p_i)$ with $p_i = \frac{N_i}{N}$<br>The relative abundance of species i within the field (N <sub>i</sub> : abundance of species i, N : total number of individuals) | Diversity index, which takes into account both the number of species and their diversity. H tends to 0 when one species is ultra-dominant in the community. It tends towards ln(S) when the S species are present in equal abundance in the community. | Calculated separately for herbs and shrubs/trees as well as for all species together |
|           | Berger-Parker index | D = p <sub>i, max</sub> with p <sub>i, max</sub> , max the relative abundance of the most abundant species within the field                                                                 | Dominance index, measuring the strength of the dominance of the most abundant species. Tends to 1 in monospecific communities and to 1/S when the S species are present in equal abundance in the community.                                           |                                                                                      |
| Abundance | Plant biomass       | Biomass (g) per square meter                                                                                                                                                                | Information on ecosystem productivity                                                                                                                                                                                                                  | Measured for herbaceous, shrub and tree species together                             |
|           | Plant density       | Number of individuals per square meter                                                                                                                                                      | Weed reproduction success, competition, soil moisture                                                                                                                                                                                                  |                                                                                      |



### 2.3. Diversity indices

180 We used multiple descriptors of weed communities that provided complementary information (Table 1). Plant biomass and density provided information on the potential aggressiveness of weed communities towards the crop. The number of weed species is a simple measure of plant richness, which we complemented by diversity and dominance indices – describing respectively the diversity of the whole community (Shannon index, noted  $H'$ ) and the strength of the dominance by the main  
185 species (Berger-Parker index, noted  $D$ ). Diversity and dominance are important indicators of the resistance and the resilience of an ecosystem, as more diverse communities are likely to be more stable and resilient (McCann, 2000).

We ranked the species according to a Relative Importance index  $RI$  (e.g. Cardina et al., 2002), adapted from the Importance Value Index (which also takes into account biomass or basal area) to  
190 distinguish between the most common, intermediate and rare species.

$$RI_i = \frac{1}{2}(f_i + p_i)$$

$RI$  ranged from 0 to 1 and was calculated for each species  $i$  as the average of its relative frequency ( $f_i$ , number of plots where species  $i$  was found divided by the total number of plots) and relative  
195 abundance ( $p_i$ , number of individuals in species  $i$  divided by the total number of individuals).

### 2.4. Quantification of crop sequence variability

Information on land uses in 2013, 2014, 2015 was obtained during the first sampling in 2016 from interviews with landowners and from direct observation of crop residues. Hence, we obtained a five-year crop sequence for each field, which we divided into three three-year sequences (Fig. 1).

200 We quantified crop sequence in two ways, (1) number of crop shifts over three years, (2) total number of crops involved in the three years. We described the crop using two variables, (1) annual crop type - either maize, upland rice, or no crop i.e. fallow - and (2) young trees intercropping with annual crop or annual crop solo (Table 2). These trees were either rubber or longan trees.

For instance, maize-maize-maize sequence counts as no shifts and one crop type; maize-maize-rice  
205 counts as one shift and two crop types; maize-rice-maize counts as two shifts and two crop types; and maize-rice-fallow counts as two shifts and three crop types. For some fields, we were able to describe crop history only from 2014 onwards, in which case the first sequence was not used (Table 3).

210 **Figure 1. Quantification of the number of crop shifts or the number of crop types, over three growing seasons (example crop sequence: maize - maize - maize - rice - fallow). Larger symbols indicate the crop type at the time of sampling, while smaller symbols indicate previous crops. Vertical arrows indicate the time of sampling: for each cropping season, sampling was conducted in the rainy season just after harvest (blue arrow, same calendar year) and in the dry season, 4-5 months after harvest (red arrow, following calendar year).**

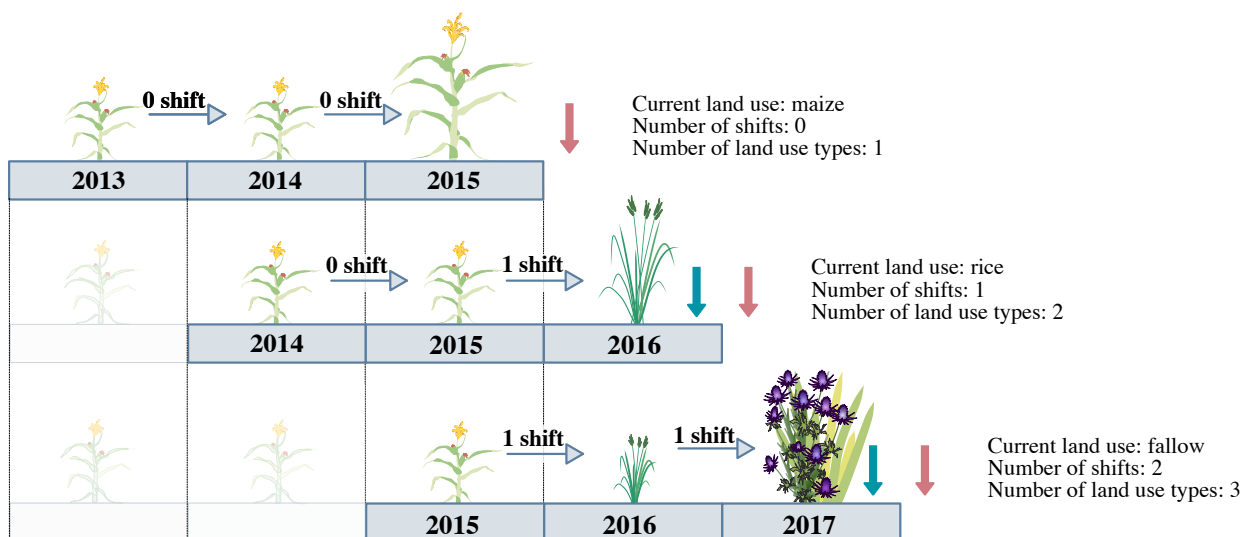

215

220 **Table 2. Description of crop type in the sampled fields (i.e. from March 2016 onwards) based on the variables annual crop and presence of young trees (rubber or longan). In parenthesis: sample size for dry and rainy season.**

|                       | Maize                                                                      | Rice                                                                      | No annual crop                                                            |
|-----------------------|----------------------------------------------------------------------------|---------------------------------------------------------------------------|---------------------------------------------------------------------------|
| <b>No young trees</b> | Maize monoculture<br>(dry season: n = 12, rainy season n = 8)              | Upland rice monoculture (dry season n = 6, rainy season n = 3)            | Fallow<br>(rainy season n = 2, dry season n = 2)                          |
| <b>Young trees</b>    | Young trees with maize intercrop<br>(dry season n = 6, rainy season n = 1) | Young trees with rice intercrop<br>(dry season n = 8, rainy season n = 8) | Young trees without intercrop<br>(dry season n = 11, rainy season n = 11) |

**Table 3. Crop sequences between 2013 and 2017. The number of crop shifts is calculated based on the crop types of the three previous growing seasons (see Fig. 1). *Nd*: no available data: the three-years sequence starting with this year was not included.**

| Field | Crop sequence          |                        |                        |                         |                         | Number of crop shifts <sup>a</sup> |           |           |
|-------|------------------------|------------------------|------------------------|-------------------------|-------------------------|------------------------------------|-----------|-----------|
|       | 2013                   | 2014                   | 2015                   | 2016                    | 2017                    | 2013-2015                          | 2014-2016 | 2015-2017 |
| 1     | <i>nd</i>              | Maize                  | Maize                  | Maize                   | Longan tree<br>+ Rice   |                                    | 0         | 1         |
| 2     | Maize                  | Maize                  | Maize                  | Maize                   | Rubber tree<br>+ Fallow | 0                                  | 0         | 1         |
| 3     | Maize                  | Maize                  | Maize                  | Maize                   | Rice                    | 0                                  | 0         | 1         |
| 4     | Maize                  | Maize                  | Maize                  | Maize                   | Rice                    | 0                                  | 0         | 1         |
| 5     | Rice                   | Maize                  | Maize                  | Maize                   | Fallow                  | 1                                  | 0         | 1         |
| 6     | <i>nd</i>              | Maize                  | Rice                   | Rice                    | Fallow                  |                                    | 1         | 1         |
| 7     | Maize                  | Maize                  | Rice                   | Maize                   | Longan tree<br>+ Maize  | 1                                  | 2         | 2         |
| 8     | <i>nd</i>              | Rice                   | Rice <sup>b</sup>      | Maize                   | Longan tree<br>+ Rice   |                                    | 1         | 2         |
| 9     | Maize                  | Maize                  | Rice                   | Maize                   | Rice                    | 1                                  | 2         | 2         |
| 10    | <i>nd</i>              | Rice                   | Rice                   | Longan tree<br>+ Fallow | Longan tree +<br>Fallow |                                    | 1         | 1         |
| 11    | Rubber tree<br>+ Maize | Rubber tree<br>+ Maize | Rubber tree<br>+ Maize | Rubber tree<br>+ Rice   | Rubber tree +<br>Fallow | 0                                  | 1         | 2         |
| 12    | Rubber tree<br>+ Maize | Rubber tree<br>+ Maize | Rubber tree<br>+ Maize | Rubber tree<br>+ Rice   | Rubber tree +<br>Fallow | 0                                  | 1         | 2         |
| 13    | Rubber tree<br>+ Maize | Rubber tree<br>+ Maize | Rubber tree<br>+ Maize | Rubber tree<br>+ Fallow | Rubber tree +<br>Fallow | 0                                  | 1         | 1         |
| 14    | Rubber tree<br>+ Maize | Rubber tree<br>+ Maize | Rubber tree<br>+ Maize | Rubber tree<br>+ Fallow | Rubber tree +<br>Fallow | 0                                  | 1         | 1         |
| 15    | Rice                   | Rubber tree<br>+ Rice  | Rubber tree<br>+ Maize | Rubber tree<br>+ Fallow | Rubber tree +<br>Fallow | 2                                  | 2         | 1         |

225

<sup>a</sup> The crop shift counting of the periods 2013-2015; 2014-2016; and 2015-2017 correspond respectively to the weed sampling in March 2016; November 2016 and March 2017; November 2017 and March 2018.

<sup>b</sup> Sampled in the dry season only.

230 Maize was the most represented annual crop in the dataset. In order to validate our main results regarding the impact of crop shifts irrespective of the identity of the current crop, all analyses were conducted twice: i/ including all available data; and ii/ including only fields with maize as the current annual crop (i.e. maize monoculture or young tree plantations with maize intercrop). For these analyses, we compared maize fields with no crop shift ( $n = 17$ ) or two crop shifts ( $n = 7$ ) because there were not enough maize fields with only one shift ( $n = 3$ ).

## 2.5. Statistical analyses

235 All analyses were conducted using R (R Core Team, 2018). We built models for each weed community characteristic described in Table 1 as a response variable. We used linear mixed models (functions *lmer* and *lme*, packages *lme4* (Bates et al., 2014) and *nlme* (Pinheiro et al., 2018) in R). Each model included as explanatory variables: the annual crop type, the presence of trees, and a spatial covariate (see below), and the temporal crop variability and its interaction with sampling season. The temporal crop variability was measured either as the number of crop shifts (levels: 0, 1 or 2) or the total number of crops involved (1, 2 or 3) in the three preceding sampling seasons (2 df, Degrees of freedom).

245 Spatial autocorrelation was also included in the model, fitted with the *lme* function, as an exponential correlation structure (function *corSpatial*). Beforehand we scaled the easting and northing coordinates of each field and added a small jitter (normal noise, mean of 0 and standard deviation of 0.001) because the function cannot handle duplicate coordinates. Other forms of spatial autocorrelation (gaussian, linear, spherical) were tested but model AIC were similar. All significance values and estimates are extracted from these models. However, to provide estimates of partial  $R^2$  for each single variable (function *r2beta*, package *r2glmm*, Kenward Roger method, Jaeger (2017)) we had to use model fitted with the *lmer* function (i.e. without spatial autocorrelation) due to package compatibility issues. As the autocovariates were not significant, this was unlikely to strongly affect the  $R^2$ .

255 Besides, the treatment of interest (number of crop shifts) was not independent of the field itself or the crop type. Indeed, we conducted botanical inventories repeatedly in the same fields and the number of crop shifts in one site was not independent from one year to another: a field with two crop shifts (or respectively zero) on a given year would necessarily have at least (resp. at most) one shift the next year. In order to take into account this non-independence, we used field-level random effects in the models. Plant densities (always strictly positive) were log-transformed, and biomasses square-

root-transformed, to ensure normality of the residuals. We conducted pairwise comparisons between each level of crop temporal variability (e.g., for the number of crop shifts, 0 v. 1, 0 v. 2 and 1 v. 2 shifts; 260 and for the number of crop types, 1 v. 2, 1 v. 3, and 2 v. 3 crop types) while keeping the other explanatory variables constant (*emmeans* function, package *emmeans*, Lenth (2018)). The significance of each variable in the full model was assessed using Anova type II or III tests (function *Anova*, package *car*, Fox et al. (2011)); thus, the effect of each variable was tested "after", or "controlling for" the other fixed effects present in the model.

265 Models including only maize fields were also mixed models including spatial autocovariates, and the explanatory variables were the same (except for the annual crop variable, which was not included).

In additional sensitivity analyses, the year was also included as a fixed effect in the models. The models were then selected based on AIC. The results from these analyses were consistent with our main results and are not presented for concision.

## 270 **2.6. Indicator species analysis**

Our last objective was to determine whether certain species were specifically associated with either high or low frequency of crop shifts. In this regard, we identified groups of indicator species related to each number of crop shifts. As proposed by Cáceres and Legendre (2009), indicator species are species that can be used as ecological indicators of environmental and ecological conditions. Their 275 association to a given environment (here, over periods of three years, the number of crops or number of shifts) is based on the specificity and the fidelity of the species as an indicator of the environmental group (i.e. here, fields with a given frequency of crop shifts). We used the *indicspecies* package (function *multipatt*, *IndVal.g* method, Cáceres and Legendre (2009)).

## **3. Results**

### 280 **3.1. Diversification of crop sequences**

From 2014 to 2018, we observed a total of 22 distinct crop sequences (Fig. 2), and an increasing diversity in crop sequences with time. In the period 2013-2015 five different sequences occurred, in the period 2015-2017 this increased to eleven (Fig 2). For instance, continuous maize cultivation (i.e. the sequence maize - maize - maize) was only observed in the period 2015-2017. Instead, fallows 285 appeared and young rubber tree plantations were intercropped with rice or maize during four to five years before the shade from the canopy prevented further intercropping.

The number of crop shifts was not independent of crop type: maize fields were more often associated with continuous cropping (no shift) compared to upland rice or fallows which were always subject to crop shifts after 1 or 2 years ( $\chi^2$  test,  $P < 10^{-6}$ ). Some farmers reported that the decision to grow maize (cash crop) or rice (subsistence crop) depended on both market and familial factors: a family running out of rice would be more likely to grow rice the next year, while the market price of maize might determine the planting of maize fields. This decision was also likely to depend on the start of the rainy season, as maize has a shorter cycle and needs therefore only part of the rainy season to complete its growth.

295

**Figure 2. Frequency distribution of 22 combinations of crop sequences occurring in farmers' fields over the period 2013-2017. T indicates the presence of young trees, i.e. rubber or longan.**

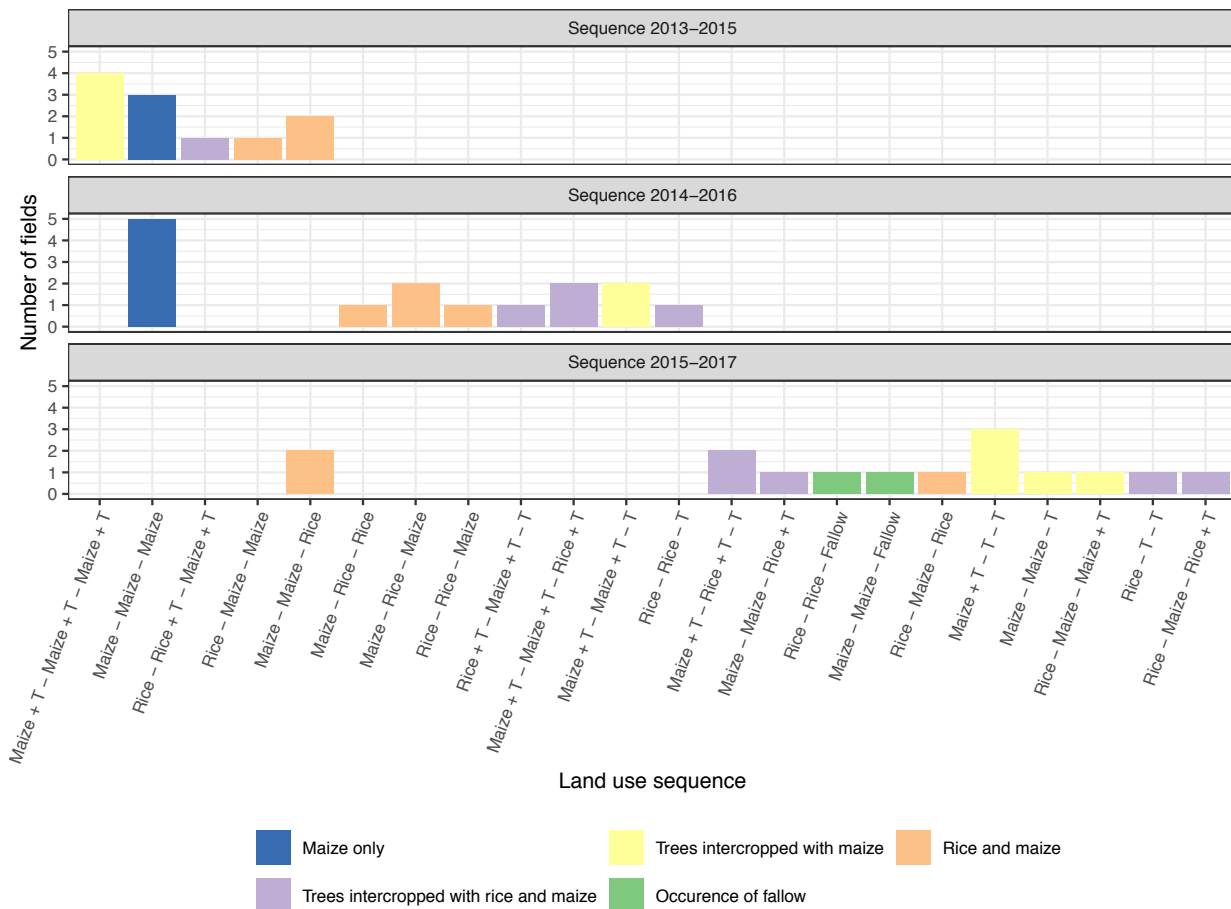

300

### 3.2. Plant richness

We found a total of 56 herbaceous species (52 identified at least to genus level), and 79 woody species (all identified) (Table S1). Fields in the dry and rainy season were equally species-rich, with 6 to 26 (median 18) species per field in the dry season and 7 to 32 (median 18) species per field in the rainy season ( $P = 0.2$ , after controlling for crop type and crop shifts). We identified three groups of species based on breaks in the Relative Importance index bar plot (Fig. 3). Three herbaceous weeds (*Ageratum conyzoides* and *Conyza sumatrensis*, Asteraceae and *Mitracarpus hirtus*, Rubiaceae) had a Relative Importance Index  $> 0.4$ , indicating that they were both very frequent and abundant. We identified 9 intermediate species with a RI comprised between 0.2 and 0.4. The least common species had a RI lower than 0.1 and comprised most shrub and tree species; among them, 43 species had a RI  $< 0.01$ .

Figure 4 shows an increase in species number among herbaceous species with more frequent crop shifts, particularly in the dry season. In fields where the crop changed every year, an average of 13 herbaceous species were recorded in the third year. This is a 36 % increase ( $P = 0.03$ ), compared to fields where three years the same crop was cultivated, where only 8.3 herbaceous species were recorded on the third year (Fig. 4). This effect was stronger than that of the crop type itself (based on partial  $R^2$ , Table 4). The richness of trees and shrubs species or of the overall community was not affected by the number of crop shifts either during the dry or the rainy season (Fig. 4, Table 4). When considering the number of crop types instead of the number of crop shifts, herbaceous species number also tended to increase with the number of crop types but the relationship was not significant.

Similarly, maize monocultures tended to have lower herbaceous species number than fields with maize as the current annual crop (i.e. maize fields or young tree plantations intercropped with maize) with two shifts in the three previous years. It was significant in the rainy season ( $P = 0.02$ ) but only a trend in the dry season ( $P = 0.07$ , Table S3, Fig. S1).

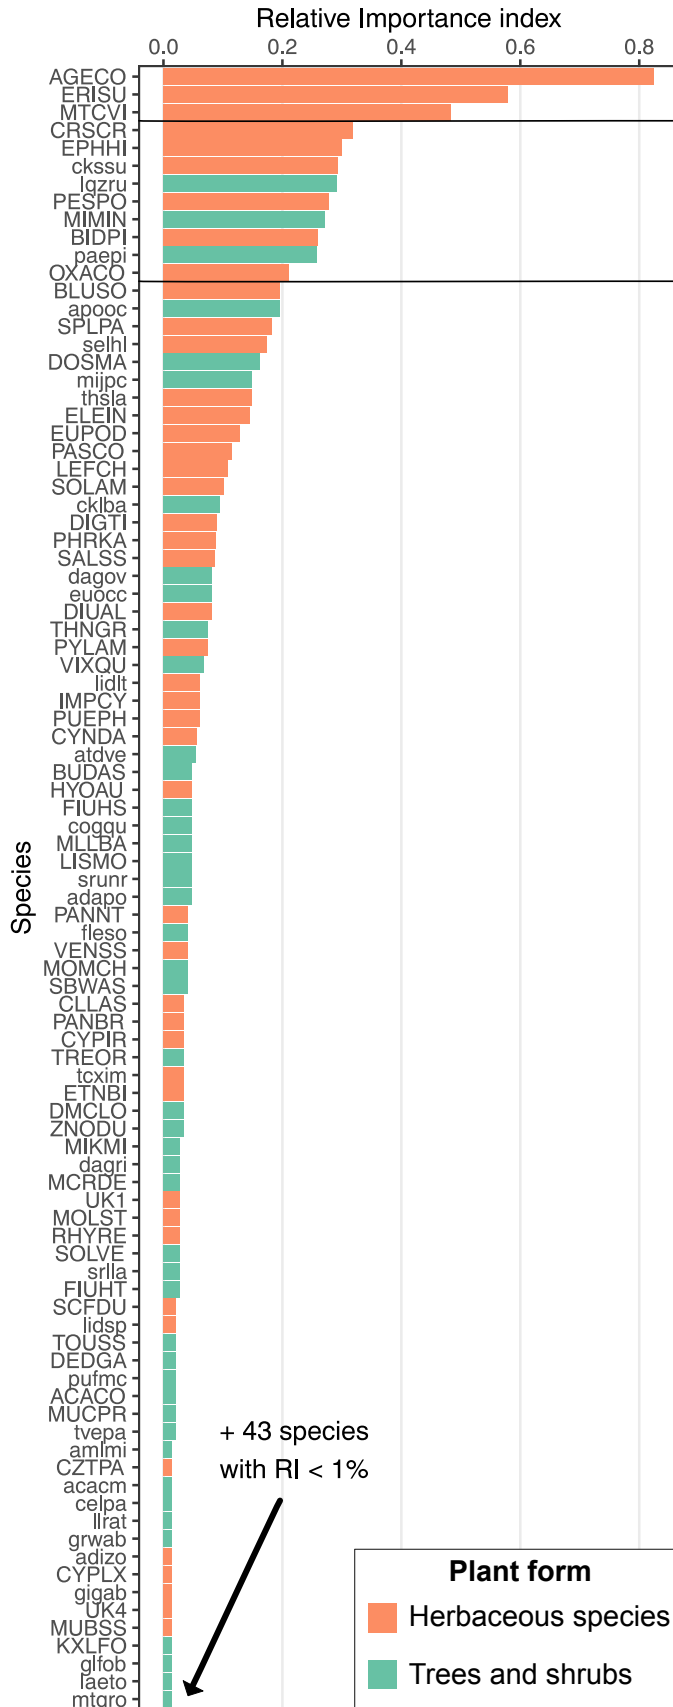

**Figure 3. Relative Importance index divides the identified species into three groups: (1) dominant, ubiquitous species, here *A. conyzoides* (AGECO), *C. sumatrensis* (ERISU) and *M. hirtus* (MTCVI) (top part) (2) intermediate species (middle part) and (3) rare species (bottom part). Species codes can be found in Table S1.**



**Figure 4. Relationships between species richness per field and number of crop shifts. Bars represent the mean  $\pm$  standard deviation, different letters indicate significant differences ( $P < 0.05$ ) within each group (herbaceous or shrub/trees). a) Dry season samples, b) Rainy season samples.**

330

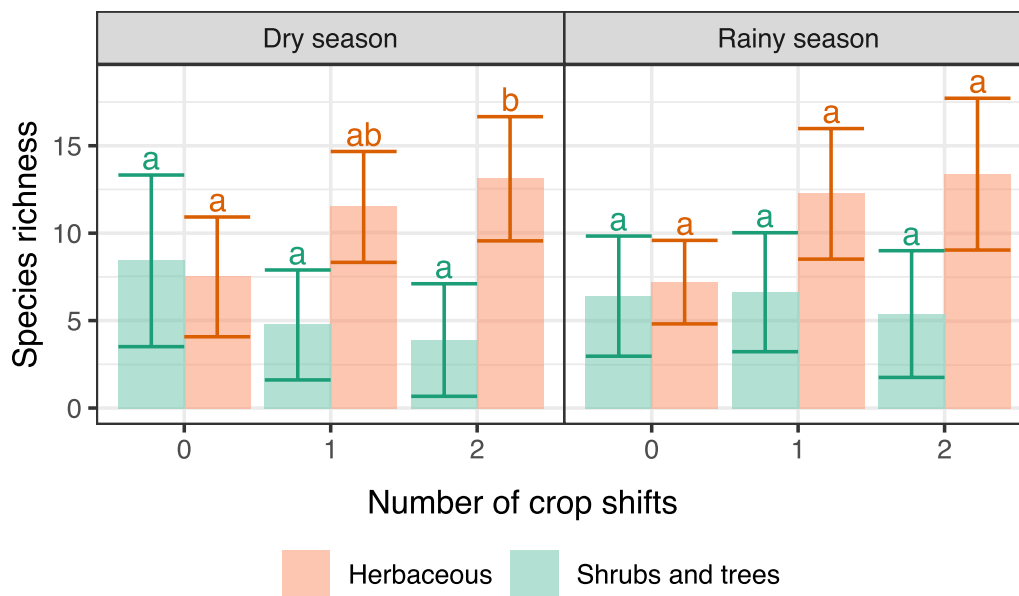

335 **Table 4. Effects of crop type and crop shifts on weed richness, diversity and abundance: results from mixed model analyses.**

a. **Pseudo-partial R<sup>2</sup> of each explanatory variable and global R<sup>2</sup> (Kenward Roger method) in percent. \*: P < 0.05. \*\*: P < 0.01. \*\*\*: P < 0.001. A dot denotes an insignificant trend (P < 0.1).**

|                                                | Number of<br>crop shifts | Season | Shifts x<br>season | Annual<br>crop | Presence<br>of trees | Global<br>R <sup>2</sup> |
|------------------------------------------------|--------------------------|--------|--------------------|----------------|----------------------|--------------------------|
| Species number (all species)                   | 4 n.s                    | 1 n.s  | 7 n.s              | 0 n.s          | 0 n.s                | 15                       |
| Species number (herbaceous species)            | 13 **                    | 1 n.s  | 0 n.s              | 6 n.s          | 2 n.s                | 37                       |
| Species number (tree and shrub species)        | 2 n.s                    | 0 n.s  | 12 *               | 3 n.s          | 4 n.s                | 21                       |
| Dominance (all species)                        | 10 *                     | 21 *** | 2 n.s              | 8 .            | 0 n.s                | 29                       |
| Dominance (herbaceous species)                 | 12 **                    | 14 **  | 3 n.s              | 9 *            | 0 n.s                | 29                       |
| Dominance (tree shrub species)                 | 0 n.s                    | 1 n.s  | 0 n.s              | 3 n.s          | 1 n.s                | 4                        |
| Shannon index (all species)                    | 7 .                      | 17 **  | 4 n.s              | 1 n.s          | 0 n.s                | 23                       |
| Shannon (herbaceous species)                   | 10 *                     | 9 *    | 5 n.s              | 1 n.s          | 2 n.s                | 25                       |
| Shannon (tree and shrub species)               | 0 n.s                    | 0 n.s  | 0 n.s              | 2 n.s          | 1 n.s                | 3                        |
| Biomass (square-root transformed, all species) | 5 n.s                    | 6 n.s  | 4 n.s              | 11 *           | 17 **                | 23                       |
| Density (log, all species)                     | 1 n.s                    | 13 *   | 4 n.s              | 1 n.s          | 2 n.s                | 17                       |

340 b. **Estimates for each number of crop shifts, presented as average (confidence interval). Different letters indicate differences significant at a 5% threshold. Responses with significant responses are represented in bold.**

|                                                | Number of<br>crop shifts | Estimate<br>(dry season)               | Estimate<br>(rainy season)              |
|------------------------------------------------|--------------------------|----------------------------------------|-----------------------------------------|
| Species number<br>(all species)                | 0                        | 15.7 (11.4 - 20) <sup>a</sup>          | 13.4 (7.9 - 18.9) <sup>a</sup>          |
|                                                | 1                        | 16.2 (13.5 - 18.9) <sup>a</sup>        | 19.1 (16.2 - 22.1) <sup>a</sup>         |
|                                                | 2                        | 17.1 (13.4 - 20.8) <sup>a</sup>        | 19.5 (15.6 - 23.4) <sup>a</sup>         |
| <b>Species number<br/>(herbaceous species)</b> | 0                        | <b>8.3 (5.3 - 11.2) <sup>a</sup></b>   | <b>8.7 (5 - 12.4) <sup>a</sup></b>      |
|                                                | 1                        | <b>11.4 (9.6 - 13.3) <sup>ab</sup></b> | <b>12.3 (10.3 - 14.4) <sup>ab</sup></b> |
|                                                | 2                        | <b>13 (10.4 - 15.6) <sup>b</sup></b>   | <b>13.7 (11 - 16.4) <sup>b</sup></b>    |
| Species number<br>(tree and shrub species)     | 0                        | 7.4 (4.3 - 10.4) <sup>a</sup>          | 4.7 (0.9 - 8.5) <sup>a</sup>            |
|                                                | 1                        | 4.7 (2.8 - 6.6) <sup>a</sup>           | 6.8 (4.7 - 8.9) <sup>a</sup>            |
|                                                | 2                        | 4.2 (1.6 - 6.8) <sup>a</sup>           | 5.8 (3 - 8.5) <sup>a</sup>              |
| <b>Dominance<br/>(all species)</b>             | 0                        | <b>0.7 (0.6 - 0.9) <sup>a</sup></b>    | 0.9 (0.7 - 1.1) <sup>a</sup>            |
|                                                | 1                        | <b>0.6 (0.5 - 0.7) <sup>ab</sup></b>   | 0.7 (0.6 - 0.8) <sup>a</sup>            |
|                                                | 2                        | <b>0.5 (0.4 - 0.6) <sup>b</sup></b>    | 0.7 (0.5 - 0.8) <sup>a</sup>            |

|                             |   |                                     |                               |
|-----------------------------|---|-------------------------------------|-------------------------------|
| <b>Dominance</b>            | 0 | <b>0.8 (0.7 - 1)</b> <sup>a</sup>   | 0.9 (0.7 - 1.1) <sup>a</sup>  |
| <b>(herbaceous species)</b> | 1 | <b>0.6 (0.5 - 0.7)</b> <sup>a</sup> | 0.7 (0.6 - 0.8) <sup>a</sup>  |
|                             | 2 | <b>0.5 (0.4 - 0.7)</b> <sup>b</sup> | 0.7 (0.6 - 0.8) <sup>a</sup>  |
| Dominance                   | 0 | 0.7 (0.5 - 0.9) <sup>a</sup>        | 0.7 (0.4 - 1) <sup>a</sup>    |
| (tree and shrub species)    | 1 | 0.7 (0.6 - 0.8) <sup>a</sup>        | 0.7 (0.6 - 0.9) <sup>a</sup>  |
|                             | 2 | 0.7 (0.5 - 0.9) <sup>a</sup>        | 0.8 (0.6 - 0.9) <sup>a</sup>  |
| <b>Shannon index</b>        | 0 | <b>1 (0.6 - 1.3)</b> <sup>a</sup>   | 0.7 (0.3 - 1.2) <sup>a</sup>  |
| <b>(all species)</b>        | 1 | <b>1.2 (1 - 1.4)</b> <sup>ab</sup>  | 1 (0.7 - 1.2) <sup>a</sup>    |
|                             | 2 | <b>1.5 (1.2 - 1.8)</b> <sup>b</sup> | 1 (0.6 - 1.3) <sup>a</sup>    |
| <b>Shannon</b>              | 0 | <b>0.7 (0.3 - 1)</b> <sup>a</sup>   | 0.6 (0.2 - 1.1) <sup>a</sup>  |
| <b>(herbaceous species)</b> | 1 | <b>1 (0.8 - 1.2)</b> <sup>ab</sup>  | 0.8 (0.6 - 1.1) <sup>a</sup>  |
|                             | 2 | <b>1.3 (1 - 1.6)</b> <sup>b</sup>   | 0.9 (0.6 - 1.2) <sup>a</sup>  |
| Shannon                     | 0 | 0.7 (0.3 - 1.2) <sup>a</sup>        | 0.7 (0.2 - 1.3) <sup>a</sup>  |
| (tree and shrub species)    | 1 | 0.7 (0.4 - 1) <sup>a</sup>          | 0.6 (0.3 - 0.9) <sup>a</sup>  |
|                             | 2 | 0.6 (0.3 - 1) <sup>a</sup>          | 0.6 (0.2 - 1) <sup>a</sup>    |
| Biomass                     | 0 | 7.5 (3.6 - 11.4) <sup>a</sup>       | 2.3 (-2.9 - 7.4) <sup>a</sup> |
| (square-root                | 1 | 8.8 (6.4 - 11.1) <sup>a</sup>       | 7.9 (5.3 - 10.6) <sup>a</sup> |
| transformed, all species)   | 2 | 7.6 (4.3 - 10.9) <sup>a</sup>       | 6.8 (3.3 - 10.2) <sup>a</sup> |
| Density                     | 0 | 5.4 (4.5 - 6.2) <sup>a</sup>        | 6.2 (5 - 7.3) <sup>a</sup>    |
| (log-transformed, all       | 1 | 5.6 (5 - 6.1) <sup>a</sup>          | 5.8 (5.2 - 6.4) <sup>a</sup>  |
| species)                    | 2 | 5.4 (4.6 - 6.2) <sup>a</sup>        | 6.4 (5.6 - 7.2) <sup>a</sup>  |

### 3.3. Plant biomass and density

345 Plant biomass (square root-transformed) and density (log-transformed) did not vary with the number of crop shifts nor the number of crop types ( $P > 0.1$ , Table 4, S2). When controlling for the number of shifts, annual crop type and the presence of trees, weed communities had lower densities (228 plant/m<sup>2</sup>) and slightly higher biomass (70.2 g/m<sup>2</sup>) in the dry compared to the rainy season (density of 412 plant/m<sup>2</sup> ( $P = 0.01$ ) and biomass of 44 g/m<sup>2</sup> (N.S.  $P = 0.08$ )).

350 Maize monocultures had significantly lower plant biomass (3.2 g/m<sup>2</sup> on average) and plant density (403 plant/m<sup>2</sup>) than maize fields with two shifts in the three previous years (respectively 88 g/m<sup>2</sup>,  $P = 0.01$ ; and 1636 plant/m<sup>2</sup>;  $P = 0.03$ ) in the rainy season. The difference was not significant in the dry season ( $P > 0.3$ , Table S3).

### 3.4. Plant diversity

355 Herbaceous weed communities were more diverse when the number of crop shifts increased, particularly in the dry season. There, the Shannon index  $H'$  increased by 46% from fields with no crop shift (0.7 on average) to in fields with two crop shifts (1.3,  $P = 0.009$ , Table 4). This effect was stronger than that of the crop type itself (based on partial  $R^2$ , Table 4). The same trend was observed for diversity in the total community (shrubs/trees included,  $P = 0.04$ ) but not for shrub/tree  
360 communities only ( $P > 0.8$ ). Herbaceous plant communities were generally more diverse in the dry season ( $H' = 0.98$ ) compared to rainy season ( $H' = 0.78$ ,  $P = 0.03$ ).

All communities were dominated by the two most abundant species – usually *A. conyzoides* (dominant in 57% of the fields) followed by *C. sumatrensis* (22% of the fields) -, yet this dominance was weaker when the number of crop shifts increased. Indeed, in fields with no shift, the dominance  
365 (Berger-Parker index,  $D$ ) was 0.8 on average, which indicates that the most abundant species represented 80 % of all individuals. Conversely, dominance index decreased by 38% (to  $D = 0.5$  on average) in fields with two crop shifts ( $P = 0.03$ , Table 4). Similar trends for diversity and dominance were observed when considering the number of crops (Table S2).

When controlling for the crop shifts, crop type and the presence of trees, dominance of herbaceous  
370 species, but not of shrubs and trees was significantly higher in the rainy ( $D = 0.7$ ) than the dry season ( $D = 0.6$ ,  $P < 0.05$ , data not shown). This can be explained by the declining numbers of the two dominant weeds *A. conyzoides* and *Conyza sumatrensis*, both annual species. Annual species tend to end their life cycle in the dry season, modifying dominance and diversity. This was not observed in woody species because they are all perennials. Conversely, Shannon index was higher in the dry ( $H'$

375 = 0.98) compared to rainy season ( $H' = 0.78$ ,  $P = 0.03$ ) for herbaceous species; it was also significant for all species but not for shrub and tree species (data not shown).

380 Consistently with the results considering all crop types, the diversity of the total community in the dry season was lower in maize monocultures ( $H' = 1.1$ ) than in maize fields with two shifts ( $H' = 1.6$ ,  $P = 0.01$ , Table S3). Diversity for the total community followed the same trend as for herbaceous species only, probably because the woody fraction was altogether relatively small in maize monoculture. Dominance did not vary significantly between maize monocultures and maize with two shifts.

385 **Table 5. Indicator species associated with fields with zero, one or two crop shifts in the three years preceding sampling. Test statistic is the IndVal.g association index. \*\*\*  $P < 0.001$ , \*\*  $P < 0.01$ , \*  $P < 0.05$ .**

| Growth form                          | Species                       | Test statistic | Significance |
|--------------------------------------|-------------------------------|----------------|--------------|
| <b>Fields with zero shift</b>        |                               |                |              |
| Tree                                 | <i>Antidesma velutinsum</i>   | 0.534          | *            |
| Shrub                                | <i>Streblus asper</i>         | 0.485          | *            |
| Liana                                | <i>Tournefortia sp.</i>       | 0.420          | *            |
| <b>Fields with zero to one shift</b> |                               |                |              |
| Tree                                 | <i>Diospyros malabarica</i>   | 0.629          | *            |
| Large liana                          | <i>Millettia pachycarpa</i>   | 0.599          | *            |
| <b>Fields with one to two shifts</b> |                               |                |              |
| Ground fern                          | <i>Thelepterys subelatus</i>  | 0.830          | ***          |
| Annual herb                          | <i>Bidens pilosa</i>          | 0.749          | *            |
| Perennial C <sub>3</sub> grass       | <i>Thysanolaena latifolia</i> | 0.625          | *            |
| <b>Fields with two shifts</b>        |                               |                |              |
| Annual C <sub>4</sub> grass          | <i>Digitaria radicata</i>     | 0.547          | **           |
| Tree                                 | <i>Vitex quinata</i>          | 0.510          | *            |
| Perennial herb                       | <i>Centella asiatica</i>      | 0.479          | **           |
| Perennial vine                       | <i>Thunbergia grandiflora</i> | 0.475          | *            |

### 3.5. Indicator species

390 We found that 12 species were indicators of a precise number of crop shifts, or a range of crop shifts,  
in the three years preceding sampling (Table 5). For example, *Digitaria radicata* (annual, creeping C4  
grass) and *Centella asiatica* (perennial, creeping herb) were strongly associated to fields with two  
shifts while the shade-tolerant fern *Thelopterys subelatus* was a good indicator of fields with either  
one or two crop shifts in the previous three years. Conversely, *Antidesma velutinsum*, a tree, *Streblus*  
395 *asper*, a shrub and *Tournefortia sp.*, a liana, were found mostly in continuous cropping, with no shifts  
over the previous three years.

## 4. Discussion

### 4.1. Crop sequence variability

In northern Thailand farmers often grow maize for several consecutive years, with occasionally  
400 upland rice to break the maize monoculture. Conversely, upland rice is only cultivated for 1 or 2  
consecutive years. Intercropping of upland rice and maize with young rubber trees whose canopy is  
still open enough or with longan saplings is another option for farmers. The farmers' motives for crop  
shifts and intercropping were difficult to apprehend and impossible to verify. However, we can  
distinguish between socio-economic reasons and ecological-technical ones.

405 Socio-economic motives include market prices and labour availability. For instance, the persistently  
low market price for rubber since 2011 induces farmers to plant fruit trees (longan) instead of rubber  
trees. Labour demand in upland rice is more important than in maize, yet rice requires less modern  
inputs compared to maize, e.g. hybrid seed, frequent herbicide spraying. More interesting, because  
linked to weed control strategies, are the ecological and technical motives for crop sequences. Weed  
410 infestation usually prevents cultivating rice more than 2-3 years in a row while maize as a crop is  
much more resistant to weeds (Sankaran and de Datta, 1986). Moreover, the herbicide-resistant  
maize varieties allow the continuing use of herbicides later in the season. In the study area weeds do  
not seem to limit the continuous cultivation of maize, however, a growing built-up of aggressive  
weeds could compromise a shift to upland rice. For instance, heavily infested fields in Laos no longer  
415 support upland rice (Dupin *et al*, 2009). The local bimodal rainfall distribution has a long rainy season  
but is subject to intermittent dry spells, which could lead farmers to favour maize over upland rice.  
Indeed, sowing and harvest dates of the traditional long-cycle upland rice varieties cannot be  
modified, while the short-cycle hybrid maize is more flexible: for instance, we observed both

420 harvested and immature maize fields during our October 2016 sampling. The reason for early or late planting could be to avoid drought. A second advantage of maize is that the hill density can be reduced to adjust to water availability: low density planting provides more opportunities for weeds to grow, but weeds can be controlled by late herbicide spraying. In upland rice, hill density is high and cannot be modified without compromising the weed-competitiveness of the leafy, high stature varieties.

425 This difference between rice and maize cultivation led to the emergence of two groups of crop sequences among the fields we investigated. One consisted of continuous maize cultivation (either continuous maize monoculture or intercrop between tree rows) and the other with alternating cultivation of maize and rice. Neyret *et al.* (2018) reported higher richness and greater diversity of weed communities in upland rice than in maize. A similar result is demonstrated here, in crop sequences containing upland rice and in sequences of only maize. Differences in cultivation and weeding practices among crops are at least partly responsible for the crop-effect in weed communities (Neyret *et al.*, 2018). This leads to variability in community composition from year to year and thus to the increase of weed richness with the number of crop shifts. Thus, while the crop type effect and the “number of crop shifts” effect are partly confounded in this study, we tried to separate the two effects, i.e. by (1) including the effect of annual crop type and the presence of trees 430 in the models, and (2) controlling for crop type before measuring the effect of the number of shifts. Besides, the positive effect of crop shifts on weed richness was at least partly supported when considering only maize fields, i.e. when removing any possible confusion with the annual crop currently grown in the field. Thus, while crop type was very likely to affect the richness, diversity and abundance of weeds in this trial, we showed that the number of shifts had an effect independently 435 from crop type.

## 4.2. Crop shifts increase herbaceous species number and diversity

Our finding that plant diversity increases with shift frequency is also consistent with the literature. Previous studies, mostly in temperate areas, indeed found that increasing the inter-annual variability of land use had a positive effect on weed richness and diversity (Liebman and Dyck, 1993; Doucet *et al.*, 1999; Squire *et al.*, 2000; Ulber *et al.*, 2009). For instance, Allan *et al.* (2014) showed that in 445 grasslands, weed richness (and especially rare plants richness) increased with the temporal heterogeneity of fertilisation, mowing and grazing intensity, independently of the level of intensity itself. Using a simulation approach, Bürger *et al.* (2015) showed that while tillage was the main factor affecting weed diversity, the simplification of crop rotations also reduced biodiversity, especially in 450 regions already harbouring low diversities.

In addition, our study showed that the effect of the number of crop shifts on herbaceous species number and diversity was stronger than that of crop type, contrarily to previous results (Bàrberi et al., 1997; Smith and Gross, 2007). The outcome of studies investigating the effects of temporal diversity on plants depends on the timescale of the study. Such effects are likely to be noticeable only  
455 when looking at the total weed flora within a field, by looking either at the seedbank or at the flora over multiple years, as opposed to looking at the flora within a single year only (Dessaint et al., 1997). Altogether, this suggests that in the long-term, the severely degrading effect on biodiversity of some crops could be offset by annual rotations with more biodiversity-friendly land uses. Additional studies of similar agro-ecosystems investigating the effect of longer-term crop rotations could thus provide  
460 further confirmation of our results.

### 4.3. Species associated with high shift frequency

Although no species were entirely restricted to a given frequency of crop shifts, we were able to show that some species were significantly associated to either frequently shifting fields or continuous crops. The three dominant herbaceous species – *Ageratum conyzoides*, *Mitracarpus hirtus* and *Conyza*  
465 *sumatrensis*) were ubiquitous, and thus not associated to any particular crop. All species associated with fields with zero shift or one to two shifts were tree species, while the two species most significantly associated with fields with two shifts (*Digitaria radicata* and *Centella asiatica*) were herbaceous annuals. Besides, contrarily to herbaceous species, trees and shrubs richness and diversity did not respond to changes in the number of crop shifts or the number of land use types.  
470 This suggests a weaker response of trees and shrubs to year-to-year shifts, compared to herbaceous species, which grow and reproduce more quickly. Indeed, perennial species (including a few of the herbaceous species, but all shrub and tree species) have more underground reserves from which they can directly regrow (Raunkiaer, 1934). This makes them less dependent on local conditions and farming practices to establish in a given field.

### 4.4. Seasonal effect on weeds richness and abundance

We showed that although species number did not vary significantly with season, there was a strong decrease in plant biomass, but increase in plant density in the rainy season compared to the dry season. Fewer yet larger individual plants in the dry season than in the rainy season can be explained by a combination of at least three factors. The life cycle of annual weeds runs with the rainy season  
480 so their life cycle naturally ends in the dry season, reducing density. Secondly, the dry season, for its lack of surface soil moisture, is less suitable than the rainy season for new emergences; instead, well-



established individuals can expand in the dry season, their roots exploring moisture in the deeper soil layers. Finally, the fields sampled in the dry season had not experienced weed control for at least six months, allowing for self-thinning among seedlings and the outgrow of the more vigorous individuals.

485 Most of the seedlings found in the rainy season belonged to the three dominant species, which also explains the decrease in species diversity, and the increase in the dominance index. *A. conyzoides* in particular has a very effective reproduction rate, producing numerous seeds with high germination rates (Kohli et al., 2006; Hao et al., 2009). This dominance by the main species in the rainy season was likely to explain the strongest response to crop shifts on species number in the dry compared to rainy  
490 season.

#### 4.5. Resource and disturbance variability

Gaba et al. (2014) identified two main gradients driving the abundance and diversity of weeds in crop rotations. On the one hand, the resource variability gradient represents the temporal variability of resource availability in the field, which is expected to increase weed diversity through niche  
495 diversification. On the other hand, the disturbance gradient represents the type and frequency of disturbance, which is expected to increase mortality rates and to decrease weed abundance.

Contrarily to our expectations, we did not detect a change in weed biomass or weed density with crop shifts. This was probably due to the fact that fields with frequent shifts did not necessarily have a higher variability of disturbance types and timing, which is expected to be the main driver of the changes in weed abundance (Gaba et al., 2014). Maize and rice fields had relatively similar soil  
500 preparation as well as fertilisation rates: thus, the type and timing of disturbance were unlikely to differ among fields (except for fallows). While in this trial we did not have data on crop yield, the experiment was farmer-managed, thus weed control was assumed sufficient in achieving an acceptable yield. Additional measures of yield and crop biomass would be needed to confirm whether  
505 the frequency of crop shifts affects the actual aggressiveness of weed communities towards the crop.

In terms of resource variability, rice and maize created different light conditions, which is known to be an important determinant of weed growth (Holt, 1995): while rice grows very densely, quickly covering the ground and limiting weed growth, maize (planted at relatively low density in the study system) leaves most of the soil bare and triggers the germination of photosensitive species. Many  
510 common tropical weed seeds require full sunlight to germinate (example *A. conyzoides* and *C. sumatrensis*), while other prefer light shade (*Chromolaena odorata*) (Garwood, 1989; de Rouw et al., 2013). Thus, in fields with frequent shifts, the reproduction rates of very competitive, heliophilous species with high seed production are regularly lowered by less favourable conditions. This creates

opportunities for new species to germinate from the seedbank or to establish from neighbour  
515 communities, and explains the lower dominance index in fields with frequent shifts. Frequent shifts  
thus prevent the selection of species functionally close to the crop (Liebman and Dyck, 1993; Smith  
et al., 2010).

Sites with permanent annual cropping have large seed banks, between 5000 and 10 000 viable  
520 seeds/m<sup>2</sup> (Garwood, 1989). In Laos, soil seed banks were found similar across upland rice sites, in  
density and composition, but weed species abundances in the cultivated fields were not correlated  
with densities in the seed bank. These results indicate that emergence during the cultivation period  
reflected the local growing conditions far more than their availability in the seed bank (de Rouw et  
al., 2013). In our study system, rice and maize residues are likely to create different humidity  
525 conditions, which could favour the germination of different fractions of the seedbank. Rice and maize  
also had different sowing and harvesting times, which have been shown to be major determinants of  
the functional composition of weed communities (Gunton et al., 2011). For instance, maize has a much  
shorter growing period, which leaves the fields almost fallow-like with dry maize stalks during a large  
part of the year. The later application of herbicides in maize (e.g. after germination), repeated in maize  
530 fields with no shifts, might also have led to the selection of species able to recover quickly after  
spraying, such as *A. conyzoides*. Thus, crops changing from year to year provide variable germinating  
and growing conditions for weeds, and a selection of different species from one season to another.  
This allows the maintenance of diverse communities over time by allowing species with different  
responses to the environment to coexist stably in different niches (Allan et al., 2014; Gaba et al., 2014).

## 6. Conclusion

535 Promoting diversified and less competitive weed communities favours the continued provision of  
weed ecosystem services, such as support for diversity at higher trophic levels or erosion mitigation.  
By measuring the short-term frequency of crop shifts, we were able to show that the number of crop  
shifts had a significantly positive effect on the richness and diversity of herbaceous weed  
communities. It did not, however, affect their overall abundance. These results show that yearly crop  
540 shifts in this area are not adequate to control weed biomass and their competitiveness toward the crop,  
but support plant diversity conservation. Future research should address crop shifts in longer and  
diversified crop sequences in these threatened, rapidly changing agro-ecosystems to further  
determine their potential for weed control and diversity conservation.

## Acknowledgements

545 This study was realised during a research project of Sorbonne University and Institut de Recherche pour le Développement; and was supported by the ANR HeveAdapt project (grant ANR-14-CE030012-04) of the French Agence Nationale de la Recherche. Fieldwork was realised with the cooperation of the Huai Lang Royal Project Center and the Land Development Department of Thailand. We thank two anonymous reviewers for their thoughtful comments.

## 550 Data availability

Data and R code used in this study will be made available online upon acceptance.

## References

- Adler, P.B., HilleRisLambers, J., Kyriakidis, P.C., Guan, Q., Levine, J.M., 2006. Climate variability has a stabilizing effect on the coexistence of prairie grasses. *Proc. Natl. Acad. Sci.* 103, 12793–12798.
- 555 Allan, E., Bossdorf, O., Dormann, C.F., Prati, D., Gossner, M.M., Tschardtke, T., Blüthgen, N., Bellach, M., Birkhofer, K., Boch, S., 2014. Interannual variation in land-use intensity enhances grassland multidiversity. *Proc. Natl. Acad. Sci.* 111, 308–313.
- Baessler, C., Klotz, S., 2006. Effects of changes in agricultural land-use on landscape structure and arable weed vegetation over the last 50 years. *Agric. Ecosyst. Environ.* 115, 43–50.
- 560 <https://doi.org/10.1016/j.agee.2005.12.007>
- Bàrberi, P., Burgio, G., Dinelli, G., Moonen, A.C., Otto, S., Vazzana, C., Zanin, G., 2010. Functional biodiversity in the agricultural landscape: relationships between weeds and arthropod fauna. *Weed Res.* 50, 388–401. <https://doi.org/10.1111/j.1365-3180.2010.00798.x>
- Bàrberi, P., Silvestri, N., Bonari, E., 1997. Weed communities of winter wheat as influenced by input level and rotation. *Weed Res.* 37, 301–313.
- 565 Bates, D., Maechler, M., Bolker, B., Walker, S., 2014. *lme4: Linear mixed-effects models using Eigen and S4*. R Package Version.
- Beierkuhnlein, C., Jentsch, A., 2004. Ecological importance of species diversity, in: *Plant Diversity and Evolution*. Southern Cross University, Lismore, Australia.
- 570 Bürger, J., Darmency, H., Granger, S., Guyot, S.H.M., Messéan, A., Colbach, N., 2015. Simulation study of the impact of changed cropping practices in conventional and GM maize on weeds and associated biodiversity. *Agric. Syst.* 137, 51–63. <https://doi.org/10.1016/j.agsy.2015.03.009>

- Burylo, M., Rey, F., Bochet, E., Dutoit, T., 2012a. Plant functional traits and species ability for sediment retention during concentrated flow erosion. *Plant Soil* 353, 135–144.  
575 <https://doi.org/10.1007/s11104-011-1017-2>
- Burylo, M., Rey, F., Mathys, N., Dutoit, T., 2012b. Plant root traits affecting the resistance of soils to concentrated flow erosion: Plant root traits and soil stability. *Earth Surf. Process. Landf.* 37, 1463–1470. <https://doi.org/10.1002/esp.3248>
- Cáceres, M.D., Legendre, P., 2009. Associations between species and groups of sites: indices and statistical inference. *Ecology* 90, 3566–3574. <https://doi.org/10.1890/08-1823.1>  
580
- Cardina, J., Herms, C.P., Doohan, D.J., 2002. Crop rotation and tillage system effects on weed seedbanks. *Weed Sci.* 50, 448–460. [https://doi.org/10.1614/0043-1745\(2002\)050\[0448:cratse\]2.0.co;2](https://doi.org/10.1614/0043-1745(2002)050[0448:cratse]2.0.co;2)
- Chen, X., Yang, Y., Tang, J.-J., 2004. Species-diversified plant cover enhances orchard ecosystem resistance to climatic stress and soil erosion in subtropical hillside. *J. Zhejiang Univ. Sci.* 5, 1191–1198.  
585 <https://doi.org/10.1631/jzus.2004.1191>
- Colbach, N., Lucas, P., Cavelier, N., 1994. Influence des successions culturales sur les maladies du pied et des racines du blé d'hiver. *Agronomie* 14, 525–540. <https://doi.org/10.1051/agro:19940805>
- Crowder, D.W., Jabbour, R., 2014. Relationships between biodiversity and biological control in agroecosystems: Current status and future challenges. *Biol. Control* 75, 8–17.  
590 <https://doi.org/10.1016/j.biocontrol.2013.10.010>
- de Rouw, A., Casagrande, M., Phaynaxay, K., Soulileuth, B., Saito, K., 2013. Soil seedbanks in slash-and-burn rice fields of northern Laos. *Weed Res.* 54, 26–37. <https://doi.org/10.1111/wre.12053>
- Dessaint, F., Chadoeuf, R., Barralis, G., 1997. Nine Years' Soil Seed Bank and Weed Vegetation Relationships in an Arable Field Without Weed Control. *J. Appl. Ecol.* 34, 123.  
595 <https://doi.org/10.2307/2404853>
- Doucet, C., Weaver, S.E., Hamill, A.S., Zhang, J., 1999. Separating the effects of crop rotation from weed management on weed density and diversity. *Weed Sci.* 729–735.
- Durán Zuazo, V.H., Pleguezuelo, C.R.R., 2008. Soil-erosion and runoff prevention by plant covers. A review. *Agron. Sustain. Dev.* 28, 65–86. [https://doi.org/10.1007/978-90-481-2666-8\\_48](https://doi.org/10.1007/978-90-481-2666-8_48)  
600
- Edesi, L., Jarvan, M., Adamson, A., Lauringson, E., Kuht, J., 2012. Weed species diversity and community composition in conventional and organic farming: a five-year experiment. *Zemdirb. Agric.* 99, 339–346. [https://doi.org/10.1016/S0167-8809\(03\)00117-8](https://doi.org/10.1016/S0167-8809(03)00117-8)
- Fox, J., Weisberg, S., Price, B., 2011. *Package car: An R companion to applied regression*, Second. ed.  
605 Sage.

Fox, J.M., Castella, J.-C., Ziegler, A.D., 2014. Swidden, rubber and carbon: Can REDD+ work for people and the environment in Montane Mainland Southeast Asia? *Glob. Environ. Change* 29, 318–326. <https://doi.org/10.1016/j.gloenvcha.2013.05.011>

610 Fried, G., Chauvel, B., Reboud, X., 2015. Weed flora shifts and specialisation in winter oilseed rape in France. *Weed Res.* 55, 514–524. <https://doi.org/10.1111/wre.12164>

Fried, G., Kazakou, E., Gaba, S., 2012. Trajectories of weed communities explained by traits associated with species' response to management practices. *Agric. Ecosyst. Environ.* 158, 147–155. <https://doi.org/10.1016/j.agee.2012.06.005>

615 Fried, G., Petit, S., Dessaint, F., Reboud, X., 2009. Arable weed decline in Northern France: Crop edges as refugia for weed conservation? *Biol. Conserv.* 142, 238–243. <https://doi.org/10.1016/j.biocon.2008.09.029>

Fried, G., Petit, S., Reboud, X., 2010. A specialist-generalist classification of the arable flora and its response to changes in agricultural practices. *BMC Ecol.* 10, 20. <https://doi.org/10.1186/1472-6785-10-20>

620 Gaba, S., Fried, G., Kazakou, E., Chauvel, B., Navas, M.-L., 2014. Agroecological weed control using a functional approach: a review of cropping systems diversity. *Agron. Sustain. Dev.* 34, 103–119. <https://doi.org/10.1007/s13593-013-0166-5>

Garwood, N.C., 1989. Tropical Soil Seed Banks: A Review, in: Leck, M.A., Parker, V.T., Simpson, R.L. (Eds.), *Ecology of Soil Seed Banks*. San Diego, CA.

625 Gholamhoseini, M., Agha Alikhani, M., Mirlatifi, S.M., Sanavy, S.A.M.M., 2013a. Weeds – Friend or foe? Increasing forage yield and decreasing nitrate leaching on a corn forage farm infested by redroot pigweed. *Agric. Ecosyst. Environ.* 179, 151–162. <https://doi.org/10.1016/j.agee.2013.08.016>

630 Gholamhoseini, M., AghaAlikhani, M., Modarres Sanavy, S.A.M., Mirlatifi, S.M., 2013b. Interactions of irrigation, weed and nitrogen on corn yield, nitrogen use efficiency and nitrate leaching. *Water Manag.* 126, 9–18. <https://doi.org/10.1016/j.agwat.2013.05.002>

Gunton, R.M., Petit, S., Gaba, S., 2011. Functional traits relating arable weed communities to crop characteristics: Traits relating weed communities to crops. *J. Veg. Sci.* 22, 541–550. <https://doi.org/10.1111/j.1654-1103.2011.01273.x>

635 Hao, J.-H., Qiang, S., Liu, Q.-Q., Cao, F., 2009. Reproductive traits associated with invasiveness in *Conyza sumatrensis*. *J. Syst. Evol.* 47, 245–254.

Holt, J.S., 1995. Plant Responses to Light: A Potential Tool for Weed Management. *Weed Sci.* 43, 474:482. <https://doi.org/10.1111/wbm.12039>

- Hyvönen, T., Glemnitz, M., Radics, L., Hoffmann, J., 2011. Impact of climate and land use type on the distribution of Finnish casual arable weeds in Europe. *Weed Res.* 51, 201–208.  
640 <https://doi.org/10.1111/j.1365-3180.2010.00826.x>
- Hyvönen, T., Salonen, J., 2002. Weed species diversity and community composition in cropping practices at two intensity levels—a six-year experiment. *Plant Ecol.* 159, 73–81.  
<https://doi.org/10.1023/A:1015580722191>
- Jaeger, B., 2017. Package ‘r2glmm’: Computes R Squared for Mixed (Multilevel) Models. R Package  
645 Version 012.
- Kohli, R.K., Batish, D.R., Singh, H.P., Dogra, K.S., 2006. Status, invasiveness and environmental threats of three tropical American invasive weeds (*Parthenium hysterophorus* L., *Ageratum conyzoides* L., *Lantana camara* L.) in India. *Biol. Invasions* 8, 1501–1510.
- Lenth, R., 2018. Package ‘emmeans’: Estimated Marginal Means, aka Least-Squares Means. R  
650 Package Version 122.
- Liebman, M., Dyck, E., 1993. Crop Rotation and Intercropping Strategies for Weed Management. *Ecol. Appl.* 3, 92–122. <https://doi.org/10.2307/1941795>
- Marshall, E.J.P., Brown, V.K., Boatman, N.D., Lutman, P.J.W., Squire, G.R., Ward, L.K., 2003. The role of weeds in supporting biological diversity within crop fields. *Weed Res.* 43, 77–89.  
655 <https://doi.org/10.1046/j.1365-3180.2003.00326.x>
- Matson, P.A., Parton, W.J., Power, A.G., Swift, M.J., 1997. Agricultural intensification and ecosystem properties. *Science* 277, 504–509. <https://doi.org/10.1126/science.277.5325.504>
- McCann, K.S., 2000. The diversity–stability debate. *Nature* 405, 228.
- Morgan, R.P.C., 2005. *Soil Erosion and Conservation*, John Wiley & Sons. ed. Blackwell Publishing.
- 660 Neyret, M., 2019. Weeds and soil erosion in a montane agro- ecosystem of Northern Thailand: a multidisciplinary analysis (PhD Thesis). Sorbonne Université, Paris.
- Neyret, M., Robain, H., de Rouw, A., Soulileuth, B., Trisophon, K., Jumpa, K., Valentin, C., 2018. The transition from arable lands to rubber tree plantations in northern Thailand impacts weed assemblages and soil physical properties. *Soil Use Manag.* 34, 404–417.  
665 <https://doi.org/10.1111/sum.12431>
- Nikolić, L., Šeremešić, S., Milošev, D., \DJalović, I., Latković, D., 2018. Weed infestation and biodiversity of winter wheat under the effect of long-term crop rotation. *Appl. Ecol. Environ. Res.* 16, 1413–1426.
- Petit, S., Boursault, A., Guilloux, M., Munier-Jolain, N., Reboud, X., 2011. Weeds in agricultural  
670 landscapes. A review. *Agron. Sustain. Dev.* 31, 309–317. <https://doi.org/10.1051/agro/2010020>

- Pinheiro, J., Bates, D., DebRoy, S., Sarkar, S., {EISPACK authors}, Heisterkamp, S., Van Willigen, B., R-core, 2018. Package 'nlme': Linear and Nonlinear Mixed Effects Models. R Package Version 31-137.
- {R Core Team}, 2018. R: A language and environment for statistical computing. R Foundation for Statistical Computing, Vienna, Austria.
- 675 Radosevich, S., Holt, J., Ghersa, C., 1997. *Weed Ecology: Implications for management*, Wiley and Sons. ed. New York.
- Raunkiaer, C., 1934. *The life forms of plants and statistical plant geography*. Clarendon Press., Oxford.
- Rerkasem, K., Lawrence, D., Padoch, C., Schmidt-Vogt, D., Ziegler, A.D., Bruun, T.B., 2009. Consequences of Swidden Transitions for Crop and Fallow Biodiversity in Southeast Asia. *Hum. Ecol.* 37, 347–360. <https://doi.org/10.1007/s10745-009-9250-5>
- 680 Rerkasem, K., Rerkasem, B., 1995. Montane Mainland South-East Asia: agroecosystems in transition. *Glob. Environ. Change* 5, 313–322. [https://doi.org/10.1016/0959-3780\(95\)00065-V](https://doi.org/10.1016/0959-3780(95)00065-V)
- Rigg, J., Salamanca, A., Parnwell, M., 2012. Joining the Dots of Agrarian Change in Asia: A 25 Year View from Thailand. *World Dev.* 40, 1469–1481. <https://doi.org/10.1016/j.worlddev.2012.03.001>
- 685 Sankaran, S., de Datta, S.K., 1986. Weeds and Weed Management in Upland Rice. *Adv. Agron.* 38, 283–337. [https://doi.org/10.1016/S0065-2113\(08\)60679-3](https://doi.org/10.1016/S0065-2113(08)60679-3)
- Shahzad, M., Farooq, M., Jabran, K., Hussain, M., 2016. Impact of different crop rotations and tillage systems on weed infestation and productivity of bread wheat. *Crop Prot.* 89, 161–169.
- 690 Smith, R.G., Gross, K.L., 2007. Assembly of weed communities along a crop diversity gradient. *J. Appl. Ecol.* 44, 1046–1056. <https://doi.org/10.1111/j.1365-2664.2007.01335.x>
- Smith, R.G., Mortensen, D.A., Ryan, M.R., 2010. A new hypothesis for the functional role of diversity in mediating resource pools and weed–crop competition in agroecosystems. *Weed Res.* 50, 37–48. <https://doi.org/10.1111/j.1365-3180.2009.00745.x>
- 695 Squire, G.R., Rodger, S., Wright, G., 2000. Community-scale seedbank response to less intense rotation and reduced herbicide input at three sites. *Ann. Appl. Biol.* 136, 47–57. <https://doi.org/10.1111/j.1744-7348.2000.tb00008.x>
- Stokes, A., Norris, J.E., van Beek, L.P.H., Bogaard, T., Cammeraat, E., Mickovski, S.B., Jenner, A., Di Iorio, A., Fourcaud, 2008. How vegetation reinforces soil in slopes, in: *Slope Stability and Erosion Control: Ecotechnological Solutions*. pp. 65–118.
- 700 Storkey, J., Neve, P., 2018. What good is weed diversity? *Weed Res.* 58, 239–243. <https://doi.org/10.1111/wre.12310>



Tilman, D., 2001. Forecasting Agriculturally Driven Global Environmental Change. *Science* 292, 281–284. <https://doi.org/10.1126/science.1057544>

705 Tschardtke, T., Klein, A.M., Kruess, A., Steffan-Dewenter, I., Thies, C., 2005. Landscape perspectives on agricultural intensification and biodiversity – ecosystem service management. *Ecol. Lett.* 8, 857–874. <https://doi.org/10.1111/j.1461-0248.2005.00782.x>

Ulber, L., Steinmann, H.-H., Klimek, S., Isselstein, J., 2009. An on-farm approach to investigate the impact of diversified crop rotations on weed species richness and composition in winter wheat. *Weed Res.* 49, 534–543. <https://doi.org/10.1111/j.1365-3180.2009.00722.x>

710 Watson, C.A., Atkinson, D., Gosling, P., Jackson, L.R., Rayns, F.W., 2002. Managing soil fertility in organic farming systems. *Soil Use Manag.* 18, 239–247. <https://doi.org/10.1111/j.1475-2743.2002.tb00265.x>

Yagioka, A., Komatsuzaki, M., Kaneko, N., Ueno, H., 2015. Effect of no-tillage with weed cover mulching versus conventional tillage on global warming potential and nitrate leaching. *Agric. Ecosyst. Environ.* 200, 42–53. <https://doi.org/10.1016/j.agee.2014.09.011>

720

725

730



## Supplementary Material

**Table S1. List of EPPO codes, plant species, and relative importance index multiplied by 100 (100\*RI). RI (calculated as the mean of the frequency and relative abundance of the species in all plots) was multiplied by 100 to ease reading. EPPO codes in uppercase are official codes as per the EPPO database. Lowercase codes are custom codes for species absent from the database. Species labelled as "unidentified" correspond to species clearly different from the other species, but which we were unable to identify. Species labelled as "unsure" correspond to plants which might belong to one or the other of the identified species, but could not be identified with certainty (« unsure » species were not included in the analysis).**

| EPPO                      |                                                               |                  |        |
|---------------------------|---------------------------------------------------------------|------------------|--------|
| Code                      | Species name                                                  | Family           | 100*RI |
| <i>Herbaceous species</i> |                                                               |                  |        |
| SPLPA                     | <i>Acmella paniculata</i> (Wall. ex DC.) R.K.Jansen.          | Asteraceae       | 17.6   |
| adizo                     | <i>Adiantum zollingeri</i> Mett. ex Kuhn (unresolved)         | Pteridaceae      | 1.4    |
| AGECO                     | <i>Ageratum conyzoides</i> (L.) L.                            | Asteraceae       | 79.9   |
| AIIGA                     | <i>Alpinia galanga</i> (L.) Willd.                            | Zingiberaceae    | 0.9    |
| BQGEV                     | <i>Angiopteris evecta</i> (G. Forst.) Hoffm.                  | Marattiaceae     | 5      |
| AXOCO                     | <i>Axonopus compressus</i> (Sw.) P.Beauv.                     | Poaceae          | 0.5    |
| BIDPI                     | <i>Bidens pilosa</i> L.                                       | Asteraceae       | 25.5   |
| BLUSO                     | <i>Blumea lacera</i> (Burm.f.) DC.                            | Asteraceae       | 19     |
| BOEER                     | <i>Boerhavia erecta</i> L.                                    | Nyctaginaceae    | 0.5    |
| CLLAS                     | <i>Centella asiatica</i> (L.) Urb.                            | Apiaceae         | 2.3    |
| chesp                     | <i>Cheilocostus speciosus</i> (J.Koenig) C.D.Specht           | Costaceae        | 0.9    |
| EUPOD                     | <i>Chromolaena odorata</i> (L.) R.M.King & H.Rob.             | Asteraceae       | 18.5   |
| COMBE                     | <i>Commelina benghalensis</i> L.                              | Commelinaceae    | 0.5    |
| ERISU                     | <i>Conyza sumatrensis</i> (S.F.Blake) Pruski & G.Sancho       | Asteraceae       | 53.6   |
| CRSCR                     | <i>Crassocephalum crepidioides</i> (Benth.) S.Moore           | Asteraceae       | 28     |
| CYBCR                     | <i>Cyanotis cristata</i> (L.) D.Don                           | Poaceae          | 0.5    |
| ckssu                     | <i>Cyclosorus subelatus</i> (Baker) Ching subelata            | Thelypteridaceae | 34.9   |
| CYNDA                     | <i>Cynodon dactylon</i> (L.) Pers.                            | Poaceae          | 4.2    |
| CYPIR                     | <i>Cyperus iria</i> L.                                        | Cyperaceae       | 7.7    |
| CYPLX                     | <i>Cyperus laxus</i> Lam.                                     | Cyperaceae       | 2.3    |
| CZTPA                     | <i>Cyrtococcum patens</i> var. <i>latifolium</i> (Honda) Ohwi | Poaceae          | 4.1    |
| DIGTI                     | <i>Digitaria radicata</i> (J.Presl) Miq.                      | Poaceae          | 6.4    |
| DIGMB                     | <i>Digitaria setigera</i> Roth                                | Poaceae          | 0.5    |
| DIUAL                     | <i>Dioscorea alata</i> L.                                     | Dioscoreaceae    | 8.6    |

|        |                                                                                              |                 |      |
|--------|----------------------------------------------------------------------------------------------|-----------------|------|
| ELEIN  | <i>Eleusine indica</i> (L.) Gaertn.                                                          | Poaceae         | 10.2 |
| EPHHL  | <i>Euphorbia heterophylla</i> L.                                                             | Euphorbiaceae   | 0.5  |
| EPHHI  | <i>Euphorbia hirta</i> L.                                                                    | Euphorbiaceae   | 22.3 |
| FIMAE  | <i>Fimbristylis aestivalis</i> Vahl                                                          | Cyperaceae      | 0.9  |
| gigab  | <i>Gigantochloa albociliata</i> (Munro) Kurz                                                 | Poaceae         | 0.9  |
| gptch  | <i>Gymnopetalum chinense</i> (Lour.) Merr.                                                   | Cucurbitaceae   | 0.5  |
| IMP CY | <i>Imperata cylindrica</i> (L.) Raeusch.                                                     | Poaceae         | 4.5  |
| IMPSS  | <i>Imperata</i> sp. 2<br><i>Kyllinga nemoralis</i> (J.R.Forst. & G.Forst.) Dandy ex Hutch. & | Poaceae         | 4.1  |
| CYPKH  | Dalziel                                                                                      | Cyperaceae      | 0.5  |
| ETNBI  | <i>Lepistemon binectariferum</i> (Wall.) Kuntze                                              | Convolvulaceae  | 2.3  |
| LEFCH  | <i>Leptochloa chinensis</i> (L.) Nees                                                        | Poaceae         | 8.2  |
| lidlt  | <i>Lindernia latifolia</i> (unresolved)                                                      | Linderniaceae   | 5.9  |
| lidsp  | <i>Lindernia</i> sp1                                                                         | Linderniaceae   | 2.7  |
| RHYRE  | <i>Melinis repens</i>                                                                        | Poaceae         | 1.8  |
| MTCVI  | <i>Mitracarpus hirtus</i> (L.) DC.                                                           | Rubiaceae       | 43.5 |
| MOLST  | <i>Mollugo pentaphylla</i> L.                                                                | Molluginaceae   | 1.8  |
| MUBSS  | <i>Musa</i> sp.                                                                              | Musaceae        | 0.9  |
| HYOAU  | <i>Oldenlandia auricularia</i> (L.) K.Schum.                                                 | Rubiaceae       | 9.1  |
| OXACO  | <i>Oxalis corniculata</i> L.                                                                 | Oxalidaceae     | 18.6 |
| PANBR  | <i>Panicum brevifolium</i> L.                                                                | Poaceae         | 6.3  |
| PANNT  | <i>Panicum notatum</i> Retz.                                                                 | Poaceae         | 7.3  |
| PANRE  | <i>Panicum repens</i> L.                                                                     | Poaceae         | 0.5  |
| PASCO  | <i>Paspalum conjugatum</i> P.J.Bergius                                                       | Poaceae         | 16.2 |
| PESPO  | <i>Pennisetum polystachion</i> (L.) Schult.                                                  | Poaceae         | 26.4 |
| PHRKA  | <i>Phragmites karka</i> (Retz.) Trin. ex Steud..                                             | Lauraceae       | 6.8  |
| PYLAM  | <i>Phyllanthus amarus</i> Schumach. & Thonn.                                                 | Phyllanthaceae  | 6.8  |
| PHYMI  | <i>Physalis angulata</i> L.                                                                  | Solanaceae      | 0.5  |
| PUEPH  | <i>Pueraria phaseoloides</i> (Roxb.) Benth.                                                  | Leguminosae     | 4.1  |
| SALSS  | <i>Salvia</i> sp.                                                                            | Lamiaceae       | 5.9  |
| SCFDU  | <i>Scoparia dulcis</i> L.                                                                    | Plantaginaceae  | 1.4  |
| selhl  | <i>Selaginella helferi</i> Warb.                                                             | Selaginellaceae | 22.3 |
| SETPA  | <i>Setaria palmifolia</i> (J.Koenig) Stapf                                                   | Poaceae         | 0.5  |
| SIDAC  | <i>Sida acuta</i> Burm.f.                                                                    | Malvaceae       | 0.5  |
| SIDRH  | <i>Sida rhombifolia</i> L. ssp. <i>rhombifolia</i>                                           | Malvaceae       | 1.4  |
| SOLAM  | <i>Solanum americanum</i> Mill..                                                             | Solanaceae      | 6.8  |
| stjcr  | <i>Stephania crebra</i> Forman                                                               | Menispermaceae  | 0.5  |
| tcxim  | <i>tectaria impressa</i> (Fée) Holttum <i>impressa</i>                                       | Tectariaceae    | 2.3  |
| thsla  | <i>Thysanolaena latifolia</i>                                                                | Poaceae         | 17.6 |

|        |                              |               |     |
|--------|------------------------------|---------------|-----|
| UK1    | Unidentified (other species) |               | 2.7 |
| UK2    | Unidentified (other species) |               | 0.5 |
| UK3    | Unidentified (other species) |               | 1.8 |
| US1    | Unsure                       |               | 0.5 |
| US2    | Unsure                       |               | 0.9 |
| US3    | Unsure                       |               | 0.5 |
| US4    | Unsure                       |               | 0.5 |
| US5    | Unsure                       | Poaceae       | 0.9 |
| US6    | Unsure                       |               | 0.5 |
| US7    | Unsure                       | Poaceae       | 0.9 |
| US8    | Unsure                       |               | 0.5 |
| US9    | Unsure                       |               | 0.5 |
| US10   | Unsure                       |               | 0.9 |
| US11   | Unsure                       |               | 0.5 |
| US12   | Unsure                       |               | 0.9 |
| US13   | Unsure                       |               | 0.5 |
| URNLO  | Urena lobata L.              | Malvaceae     | 0.5 |
| VENSS  | Vernonia sp.                 | Compositae    | 3.6 |
| ZINOF  | Zingiber officinale Roscoe   | Zingiberaceae | 0.5 |
| zysspe | Zygostema sp.                |               | 0.9 |

---

*Shrub species*

---

|       |                                                      |                |     |
|-------|------------------------------------------------------|----------------|-----|
| ABMMO | Abelmoschus moschatus Medik. Abelmosks               | Malvaceae      | 0.5 |
| ACACO | Acacia concinna (Willd.) DC.                         | Fabaceae       | 2.3 |
| amlmi | Amalocalyx microlobus Pierre ex Spire                | Apocynaceae    | 1.4 |
| ZNODU | Anomianthus dulcis (Dunal) J.Sinclair                | Annonaceae     | 2.7 |
| adapo | Ardisia polycephala Wall. ex A.DC.                   | Primulaceae    | 3.2 |
| bwuso | Baliospermum solanifolium (Burm.) Suresh             | Euphorbiaceae  | 0.5 |
| cajcr | Cajanus crassus (King) Maesen                        | Leguminosae    | 0.5 |
| cwsgr | Casearia grewiifolia Vent.                           | Salicaceae     | 0.5 |
| celpa | Celastrus paniculatus Willd.                         | Celastraceae   | 2.7 |
| VITRE | Cissus repens Lam.                                   | Vitaceae       | 1.4 |
| cogpi | Combretum pilosum Roxb. ex G.Don                     | Combretaceae   | 0.5 |
| KXLFO | Cratoxylum formosum (Jacq.) Benth. & Hook.f. ex Dyer | Hypericaceae   | 0.9 |
| cklba | Cyclea barbata Miers                                 | Menispermaceae | 8.6 |
| dagov | Dalbergia ovata Benth.                               | Fabaceae       | 6.8 |
| dagri | Dalbergia rimosa Roxb.                               | Fabaceae       | 2.3 |
| DEDGA | Desmodium gangeticum (L.) DC.                        | Fabaceae       | 2.3 |

|       |                                            |                |      |
|-------|--------------------------------------------|----------------|------|
| DEDVE | Desmodium velutinum (Willd.) DC.           | Fabaceae       | 0.9  |
| DIUNU | Dioscorea glabra Roxb.                     | Dioscoreaceae  | 0.5  |
| elgcf | Elaeagnus conferta Roxb.                   | Elaeagnaceae   | 0.5  |
| euocc | Euonymus cochinchinensis Pierre            | Celastraceae   | 5.4  |
| FLCJA | Flacourtia jangomas (Lour.) Raeusch.       | Salicaceae     | 0.5  |
| fleso | Flemingia sootepensis Craib                | Leguminosae    | 3.6  |
| hrspe | Harrisonia perforata (Blanco) Merr.        | Rutaceae       | 0.5  |
| ixrja | Ixora javanica (Blume) DC.                 | Rubiaceae      | 0.9  |
| mbeto | Maesa ramentacea (Roxb.) A. DC.            | Primulaceae    | 0.5  |
| MLLPA | Mallotus paniculatus (Lam.) Müll.Arg.      | Euphorbiaceae  | 0.5  |
| MANES | Manihot esculenta Crantz                   | Euphorbiaceae  | 0.5  |
| MIKMI | Mikania micrantha Kunth                    | Compositae     | 4.6  |
| mijpc | Millettia pachycarpa Benth.                | Leguminosae    | 14   |
| MIMIN | Mimosa diplotricha Sauvalle                | Fabaceae       | 23.7 |
| MOMCH | Momordica charantia L.                     | Cucurbitaceae  | 2.7  |
| MUCPR | Mucuna pruriens (L.) DC.                   | Leguminosae    | 1.4  |
| paepi | Paederia pilifera Hook.f.                  | Rubiaceae      | 19.9 |
| srpqu | Sauropus quadrangularis (Willd.) Müll.Arg. | Phyllanthaceae | 0.5  |
| smiln | Smilax lanceifolia Roxb.                   | Smilacaceae    | 1.4  |
| smiov | Smilax ovalifolia Roxb. ex D.Don           | Smilacaceae    | 0.9  |
| SOLVE | Solanum verbascifolium L. (unresolved)     | Solanaceae     | 2.3  |
| TTSSS | Tetrastigma                                | Vitaceae       | 0.5  |
| tssla | Thespesia lampas (Cav.) Dalzell            | Malvaceae      | 0.5  |
| THNGR | Thunbergia grandiflora                     | Acanthaceae    | 8.2  |
| TOUSS | Tournefortia sp.                           | Boraginaceae   | 1.4  |
| tvepa | Trevesia palmata (Roxb. ex Lindl.) Vis.    | Araliaceae     | 2.3  |
| US14  | Unsure                                     |                | 0.9  |
| US15  | Unsure                                     |                | 0.5  |
| US16  | Unsure                                     |                | 0.5  |

*Tree species*

|       |                                                |                  |      |
|-------|------------------------------------------------|------------------|------|
| acacm | Acacia megaladena Desv.                        | Fabaceae         | 0.9  |
| alblu | Albizia lucidior (Steud.) I.C.Nielsen          | Fabaceae         | 0.9  |
| atdso | Antidesma sootepense Craib                     | Phyllanthaceae   | 0.5  |
| atdve | Antidesma velutinosum Blume                    | Phyllanthaceae   | 5.4  |
| apoc  | Aporosa octandra (Buch.-Ham. ex D.Don) Vickery | Phyllanthaceae   | 19.4 |
| BRNPA | Broussonetia papyrifera (L.) L'Hér. ex Vent.   | Moraceae         | 0.5  |
| BUDAS | Buddleja asiatica Lour.                        | Scrophulariaceae | 3.2  |
| llrat | Callerya atropurpurea (Wall.) Schot            | Fabaceae         | 0.9  |
| cogqu | Combretum quadrangulare Kurz                   | Combretaceae     | 4.1  |

|       |                                                                |                  |      |
|-------|----------------------------------------------------------------|------------------|------|
| DMCLO | <i>Dimocarpus longan</i> Lour.                                 | Sapindaceae      | 5.4  |
| DOSMA | <i>Diospyros malabarica</i> (Desr.) Kostel.                    | Ebenaceae        | 12.2 |
| eblts | <i>Embelia tsjeriam-cottam</i> (Roem. & Schult.) A.DC.         | Primulaceae      | 0.5  |
| eoaca | <i>Eriolaena candollei</i> Wall.                               | Malvaceae        | 0.5  |
| euyac | <i>Eurya acuminata</i> DC.                                     | Pentaphylacaceae | 1.4  |
| FIUHT | <i>Ficus hirta</i> Vahl                                        | Moraceae         | 2.3  |
| FIUHS | <i>Ficus hispida</i> L.f.                                      | Moraceae         | 5.4  |
| gadso | <i>Gardenia sootepensis</i> Hutch.                             | Rubiaceae        | 0.5  |
| GUGPI | <i>Garuga pinnata</i> Roxb.                                    | Burseraceae      | 0.5  |
| glfob | <i>Gluta obovata</i> Craib                                     | Anacardiaceae    | 1.4  |
| grwab | <i>Grewia abutilifolia</i> Vent. ex Juss.                      | Malvaceae        | 2.3  |
| HPWAR | <i>Harpullia arborea</i> (Blanco) Radlk.                       | Sapindaceae      | 0.9  |
| laeto | <i>Lagerstroemia tomentosa</i> C. Presl                        | Lythraceae       | 0.9  |
| leein | <i>Leea indica</i> (Burm. f.) Merr.                            | Vitaceae         | 0.9  |
| lqzru | <i>Lepisanthes rubiginosa</i> (Roxb.) Leenh.                   | Sapindaceae      | 26.6 |
| LISMO | <i>Litsea monopetalata</i> (Roxb.) Pers.                       | Lauraceae        | 3.2  |
| lisse | <i>Litsea semecarpifolia</i> (Wall. ex Nees) Hook.f.           | Lauraceae        | 0.5  |
| MCRDE | <i>Macaranga denticulata</i> (Blume) Müll.Arg.                 | Euphorbiaceae    | 4.1  |
| MLLBA | <i>Mallotus barbatus</i> Müll.Arg                              | Euphorbiaceae    | 3.6  |
| mkmst | <i>Markhamia stipulata</i> (Wall.) Seem                        | Bignoniaceae     | 0.5  |
| mtgro | <i>Mitragyna rotundifolia</i> (Roxb.) Kuntze                   | Rubiaceae        | 0.9  |
| MUYKO | <i>Murraya koenigii</i> (L.) Spreng.                           | Rutaceae         | 0.9  |
| ocoln | <i>Ocotea lancifolia</i> (Schott) Mez                          | Lauraceae        | 1.8  |
| rxlin | <i>Oroxylum indicum</i> (L.) Kurz                              | Bignoniaceae     | 1.4  |
| pnfsp | <i>Paranephelium</i> sp                                        | Sapindaceae      | 0.5  |
| PSIGU | <i>Psidium guajava</i> L.                                      | Myrtaceae        | 0.5  |
| pufmc | <i>Pterospermum macrocarpum</i> Hochr. (unresolved)            | Malvaceae        | 1.4  |
| sjngr | <i>Senna garrettiana</i> (Craib) H.S.Irwin & Barneby           | Fabaceae         | 0.5  |
| CASSM | <i>Senna siamea</i> (Lmk.) Irwin & Barneby                     | Fabaceae         | 0.9  |
| srlla | <i>Sterculia lanceolata</i> Cav.                               | Sterculiaceae    | 4.5  |
| srunr | <i>Stereospermum neuranthum</i> Kurz                           | Bignoniaceae     | 3.2  |
| SBWAS | <i>Streblus asper</i> Lour.                                    | Moraceae         | 2.7  |
| sysra | <i>Symplocos racemosa</i> Roxb.                                | Symplocaceae     | 0.5  |
| syzal | <i>Syzygium albiflorum</i> (Duthie ex Kurz) Bahadur & R.C.Gaur | Myrtaceae        | 0.5  |
| TREOR | <i>Trema orientalis</i> (L.) Blume                             | Cannabaceae      | 2.3  |
| UK4   | unidentified (other species)                                   |                  | 0.5  |
| VIXQU | <i>Vitex quinata</i> (Lour.) F.N.Williams                      | Lamiaceae        | 5    |
| prdse | <i>Protium serratum</i> (Wall. ex Colebr.) Engl.               | Burseraceae      | 3.2  |



**Table S2. Effects of crop type and number of crop types on weed richness, diversity and abundance: results from mixed model analyses.**

750 **c. Pseudo-partial R<sup>2</sup> of each explanatory variable and global R<sup>2</sup> (Kenward Roger method) in percent. \*: P < 0.05. \*\*: P < 0.01. \*\*\*: P < 0.001. A dot denotes an insignificant trend (P < 0.1).**

|                                                | Number<br>of crop<br>types | Seaso<br>n | Crop types<br>x season | Annual<br>crop | Presenc<br>e of trees | Global<br>R <sup>2</sup> |
|------------------------------------------------|----------------------------|------------|------------------------|----------------|-----------------------|--------------------------|
| Richness (all species)                         | 4 n.s                      | 1 n.s      | 6 n.s                  | 0 n.s          | 0 n.s                 | 15                       |
| Richness (herbaceous species)                  | 10 *                       | 1 n.s      | 1 n.s                  | 4 n.s          | 3 n.s                 | 37                       |
| Richness (tree and shrub species)              | 1 n.s                      | 1 n.s      | 11 .                   | 2 n.s          | 3 n.s                 | 21                       |
| Dominance (all species)                        | 9 *                        | 17 ***     | 0 n.s                  | 9 *            | 0 n.s                 | 27                       |
| Dominance (herbaceous species)                 | 11 **                      | 13 **      | 2 n.s                  | 12 **          | 1 n.s                 | 28                       |
| Dominance (tree shrub species)                 | 0 n.s                      | 1 n.s      | 0 n.s                  | 3 n.s          | 2 n.s                 | 5                        |
| Shannon index (all species)                    | 5 .                        | 14 ***     | 2 n.s                  | 2 n.s          | 0 n.s                 | 20                       |
| Shannon (herbaceous species)                   | 6 *                        | 10 **      | 6 n.s                  | 3 n.s          | 3 n.s                 | 25                       |
| Shannon (tree and shrub species)               | 0 n.s                      | 0 n.s      | 0 n.s                  | 2 n.s          | 1 n.s                 | 4                        |
| Biomass (square-root transformed, all species) | 3 n.s                      | 4 n.s      | 4 n.s                  | 8 .            | 9 *                   | 20                       |
| Density (log, all species)                     | 0 n.s                      | 11 *       | 1 n.s                  | 1 n.s          | 1 n.s                 | 15                       |

**d. Estimates for each number of crop types, presented as average (confidence interval). Significance letters indicate differences significant at a 5% threshold. Responses with significant responses are represented in bold.**

|                                         | Number<br>of crop<br>types | Estimate (dry season)                | Estimate (rainy season)         |
|-----------------------------------------|----------------------------|--------------------------------------|---------------------------------|
| Species number (all species)            | 1                          | 15.6 (11.4 - 19.9) <sup>a</sup>      | 13.4 (8 - 18.8) <sup>a</sup>    |
|                                         | 2                          | 16.5 (13.9 - 19) <sup>a</sup>        | 19.3 (16.6 - 22) <sup>a</sup>   |
|                                         | 3                          | 16.5 (11.8 - 21.1) <sup>a</sup>      | 18.8 (13.8 - 23.8) <sup>a</sup> |
| Species number (herbaceous species)     | 1                          | 8.2 (5.4 - 11) <sup>a</sup>          | 8.8 (5.1 - 12.5) <sup>a</sup>   |
|                                         | 2                          | 11.7 (9.9 - 13.4) <sup>a</sup>       | 12.7 (10.8 - 14.6) <sup>a</sup> |
|                                         | 3                          | 12.3 (9.2 - 15.5) <sup>a</sup>       | 12.8 (9.5 - 16.2) <sup>a</sup>  |
| Species number (tree and shrub species) | 1                          | 7.5 (4.5 - 10.5) <sup>a</sup>        | 4.9 (1.1 - 8.7) <sup>a</sup>    |
|                                         | 2                          | 4.9 (3.1 - 6.7) <sup>a</sup>         | 6.6 (4.7 - 8.5) <sup>a</sup>    |
|                                         | 3                          | 3.8 (0.5 - 7) <sup>a</sup>           | 6.2 (2.7 - 9.7) <sup>a</sup>    |
| <b>Dominance (all species)</b>          | 1                          | <b>0.8 (0.6 - 0.9) <sup>ab</sup></b> | 0.9 (0.7 - 1.1) <sup>a</sup>    |
|                                         | 2                          | <b>0.5 (0.4 - 0.6) <sup>a</sup></b>  | 0.7 (0.6 - 0.8) <sup>a</sup>    |
|                                         | 3                          | <b>0.5 (0.3 - 0.7) <sup>b</sup></b>  | 0.7 (0.5 - 0.9) <sup>a</sup>    |
| <b>Dominance (herbaceous species)</b>   | 1                          | <b>0.8 (0.7 - 1) <sup>a</sup></b>    | 0.9 (0.7 - 1.1) <sup>a</sup>    |
|                                         | 2                          | <b>0.6 (0.5 - 0.7) <sup>a</sup></b>  | 0.7 (0.6 - 0.8) <sup>a</sup>    |

|                             |   |                                      |                               |
|-----------------------------|---|--------------------------------------|-------------------------------|
|                             | 3 | <b>0.6 (0.4 - 0.7) <sup>b</sup></b>  | 0.7 (0.6 - 0.9) <sup>a</sup>  |
| Dominance                   | 1 | 0.7 (0.5 - 0.9) <sup>a</sup>         | 0.7 (0.5 - 1) <sup>a</sup>    |
| (tree and shrub species)    | 2 | 0.7 (0.6 - 0.8) <sup>a</sup>         | 0.7 (0.6 - 0.8) <sup>a</sup>  |
|                             | 3 | 0.7 (0.5 - 0.9) <sup>a</sup>         | 0.7 (0.5 - 1) <sup>a</sup>    |
| <b>Shannon index</b>        | 1 | <b>0.9 (0.6 - 1.2) <sup>a</sup></b>  | 0.7 (0.3 - 1.2) <sup>a</sup>  |
| <b>(all species)</b>        | 2 | <b>1.3 (1.1 - 1.5) <sup>ab</sup></b> | 1 (0.7 - 1.2) <sup>a</sup>    |
|                             | 3 | <b>1.5 (1.1 - 1.9) <sup>b</sup></b>  | 0.9 (0.5 - 1.3) <sup>a</sup>  |
| <b>Shannon</b>              | 1 | <b>0.6 (0.3 - 1) <sup>a</sup></b>    | 0.6 (0.2 - 1) <sup>a</sup>    |
| <b>(herbaceous species)</b> | 2 | <b>1 (0.9 - 1.2) <sup>ab</sup></b>   | 0.8 (0.6 - 1) <sup>a</sup>    |
|                             | 3 | <b>1.3 (1 - 1.7) <sup>b</sup></b>    | 0.8 (0.4 - 1.1) <sup>a</sup>  |
| Shannon                     | 1 | 0.7 (0.3 - 1.1) <sup>a</sup>         | 0.7 (0.1 - 1.2) <sup>a</sup>  |
| (tree and shrub species)    | 2 | 0.7 (0.4 - 1) <sup>a</sup>           | 0.6 (0.4 - 0.9) <sup>a</sup>  |
|                             | 3 | 0.7 (0.2 - 1.1) <sup>a</sup>         | 0.7 (0.2 - 1.2) <sup>a</sup>  |
| Biomass                     | 1 | 7.8 (4 - 11.7) <sup>a</sup>          | 3.3 (-1.8 - 8.5) <sup>a</sup> |
| (square-root                | 2 | 8.8 (6.6 - 11.1) <sup>a</sup>        | 7.8 (5.3 - 10.2) <sup>a</sup> |
| transformed, all species)   | 3 | 7.9 (3.5 - 12.2) <sup>a</sup>        | 7.9 (3.2 - 12.6) <sup>a</sup> |
| Density                     | 1 | 5.3 (4.4 - 6.2) <sup>a</sup>         | 6.1 (4.9 - 7.2) <sup>a</sup>  |
| (log-transformed, all       | 2 | 5.5 (5 - 6.1) <sup>a</sup>           | 6 (5.4 - 6.5) <sup>a</sup>    |
| species)                    | 3 | 5.4 (4.4 - 6.4) <sup>a</sup>         | 6.2 (5.2 - 7.3) <sup>a</sup>  |



**Table S3. Effects of the presence of trees and crop shifts on weed richness, diversity and abundance: results from mixed model analyses including only fields with maize as the current annual crop.**

760 **e. Pseudo-partial R<sup>2</sup> of each explanatory variable and global R<sup>2</sup> (Kenward Roger method) in percent. \*: P < 0.05. \*\*: P < 0.01. \*\*\*: P < 0.001. A dot denotes an insignificant trend (P < 0.1).**

|                                                | Number of<br>crop types | Season | Crop types<br>x season | Presence<br>of trees | Global R <sup>2</sup> |
|------------------------------------------------|-------------------------|--------|------------------------|----------------------|-----------------------|
| Species number (all species)                   | 30 *                    | 6 n.s  | 33 **                  | 6 .                  | 37                    |
| Species number (herbaceous species)            | 50 ***                  | 13 n.s | 11 n.s                 | 1 n.s                | <b>41</b>             |
| Species number (tree and shrub species)        | 0 n.s                   | 0 n.s  | 27 **                  | 14 **                | 34                    |
| Dominance (all species)                        | 18 *                    | 75 *** | 19 .                   | 24 **                | 71                    |
| Dominance (herbaceous species)                 | 19 .                    | 74 *** | 27 *                   | 30 ***               | 72                    |
| Dominance (tree shrub species)                 | 3 n.s                   | 3 n.s  | 2 n.s                  | 3 n.s                | 8                     |
| Shannon index (all species)                    | 27 **                   | 59 *** | 23 *                   | 11 .                 | 59                    |
| Shannon (herbaceous species)                   | 17 .                    | 55 **  | 33 *                   | 25 **                | 59                    |
| Shannon (tree and shrub species)               | 1 n.s                   | 2 n.s  | 1 n.s                  | 4 n.s                | 7                     |
| Biomass (square-root transformed, all species) | 54 *                    | 7 *    | 24 **                  | 23 **                | 51                    |
| Density (log, all species)                     | 47 *                    | 48 *** | 14 n.s                 | 0 n.s                | 58                    |

**a. Estimates for each number of crop shifts, presented as average (confidence interval). Significance letters indicate differences significant at a 5% threshold. Responses with significant responses are represented in bold.**

|                                            | Number of<br>crop shifts | Estimate (dry season)                | Estimate (rainy season)                |
|--------------------------------------------|--------------------------|--------------------------------------|----------------------------------------|
| <b>Species number (all species)</b>        | 0                        | 14.8 (10.8 - 18.9) <sup>a</sup>      | <b>11.9 (6.4 - 17.4) <sup>a</sup></b>  |
|                                            | 2                        | 17.7 (10.5 - 24.9) <sup>a</sup>      | <b>24.3 (16.8 - 31.8) <sup>b</sup></b> |
| <b>Species number (herbaceous species)</b> | 0                        | <b>7.4 (4.6 - 10.2) <sup>a</sup></b> | <b>7.5 (3.5 - 11.4) <sup>a</sup></b>   |
|                                            | 2                        | <b>13 (8.1 - 17.9) <sup>b</sup></b>  | <b>16.3 (11.1 - 21.5) <sup>b</sup></b> |
| Species number (tree and shrub species)    | 0                        | 7.5 (4.7 - 10.4) <sup>a</sup>        | 4.6 (0.6 - 8.5) <sup>a</sup>           |
|                                            | 2                        | 4.7 (-0.3 - 9.8) <sup>a</sup>        | 7.8 (2.5 - 13.2) <sup>a</sup>          |
| Dominance (all species)                    | 0                        | 0.6 (0.5 - 0.7) <sup>a</sup>         | 0.8 (0.7 - 0.9) <sup>a</sup>           |
|                                            | 2                        | 0.5 (0.3 - 0.6) <sup>a</sup>         | 0.8 (0.6 - 0.9) <sup>a</sup>           |
| Dominance (herbaceous species)             | 0                        | 0.7 (0.6 - 0.8) <sup>a</sup>         | 0.8 (0.7 - 1) <sup>a</sup>             |
|                                            | 2                        | 0.5 (0.3 - 0.7) <sup>a</sup>         | 0.7 (0.5 - 0.9) <sup>a</sup>           |
| Dominance (tree and shrub species)         | 0                        | 0.7 (0.5 - 0.9) <sup>a</sup>         | 0.7 (0.5 - 0.9) <sup>a</sup>           |
|                                            | 2                        | 0.7 (0.4 - 1) <sup>a</sup>           | 0.6 (0.3 - 0.9) <sup>a</sup>           |
| <b>Shannon index (all species)</b>         | 0                        | <b>1.1 (0.8 - 1.3) <sup>a</sup></b>  | 0.8 (0.4 - 1.1) <sup>a</sup>           |
|                                            | 2                        | <b>1.6 (1.3 - 2) <sup>b</sup></b>    | 0.8 (0.4 - 1.2) <sup>a</sup>           |
| Shannon (herbaceous species)               | 0                        | 0.8 (0.5 - 1.1) <sup>a</sup>         | 0.7 (0.3 - 1) <sup>a</sup>             |
|                                            | 2                        | 1.3 (0.8 - 1.8) <sup>a</sup>         | 0.9 (0.3 - 1.5) <sup>a</sup>           |

|                                  |   |                               |                                     |
|----------------------------------|---|-------------------------------|-------------------------------------|
| Shannon                          | 0 | 0.7 (0.3 - 1.1) <sup>a</sup>  | 0.7 (0.2 - 1.3) <sup>a</sup>        |
| (tree and shrub species)         | 2 | 0.7 (0 - 1.5) <sup>a</sup>    | 0.9 (0.2 - 1.7) <sup>a</sup>        |
| <b>Biomass</b>                   | 0 | 6.3 (4.1 - 8.5) <sup>a</sup>  | <b>1.5 (-2.1 - 5) <sup>a</sup></b>  |
| <b>(square-root</b>              | 2 | 7.3 (3.4 - 11.1) <sup>a</sup> | <b>9.2 (5 - 13.4) <sup>b</sup></b>  |
| <b>transformed, all species)</b> |   |                               |                                     |
| <b>Density</b>                   | 0 | 5.2 (4.6 - 5.7) <sup>a</sup>  | <b>5.9 (5 - 6.8) <sup>a</sup></b>   |
| <b>(log-transformed, all</b>     | 2 | 5.6 (4.7 - 6.5) <sup>a</sup>  | <b>7.4 (6.4 - 8.4) <sup>b</sup></b> |
| <b>species)</b>                  |   |                               |                                     |

**Figure S1. Variation of species richness per field with the number of crop shifts for fields whose current annual crop is maize. Bars represent the mean  $\pm$  standard deviation. Different letters indicate significant differences within each group ( $P < 0.05$ ).**

770

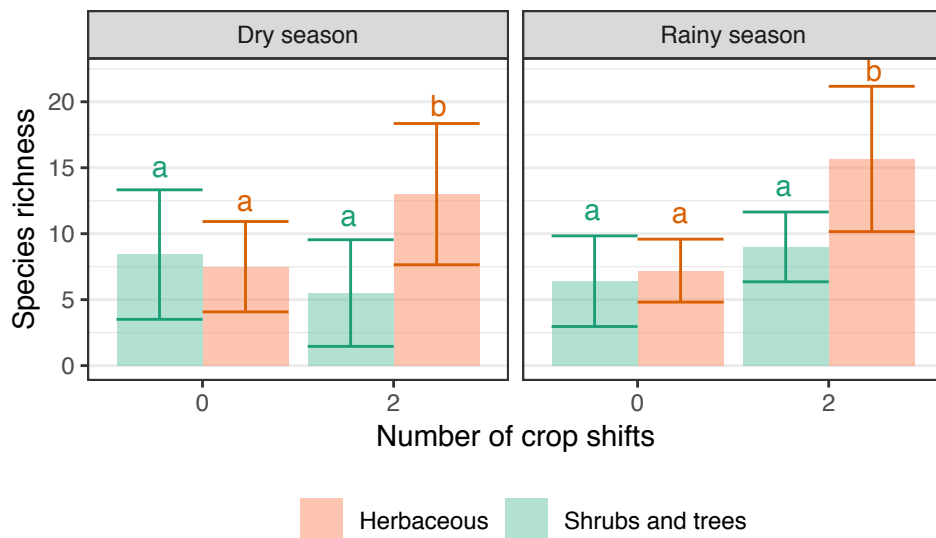

Source: https://www.biorxiv.org/content/10.1101/2020.03.12.988469v2.full.pdf
